# Supplementary material for: Population Genomics in Wild Tomatoes—The Interplay of Divergence and Admixture
Source: PubMed Central journal article supplement — Genome Biol Evol. 2017 Oct 24;9(11):3023–38. doi: 10.1093/gbe/evx224 (PMC5714242; doi:10.1093/gbe/evx224), 2017-10-24
Supplement: evx224_supp.pdf [file evx224_supp.pdf]

## Supporting Information

Article title: **Population genomics in wild tomatoes - the interplay of divergence and admixture**

Authors: Ian Beddows, Aparna Reddy, Thorsten Kloesges and Laura E. Rose

The following **Supporting Information** is available for this article:

**Supplemental Methods** Materials and methods for flow cytometry and notes on  $\partial a\partial i$ .

**Fig. S1** Read mapping data by individual

**Fig. S2** Polymorphism count by category

**Fig. S3** Count and read coverage of polymorphisms

**Fig. S4** Principle component analysis

**Fig. S5** STRUCTURE Likelihoods

**Fig. S6** Heterozygosity for all accessions

**Fig. S7**  $F_{ST}$  between species and subpopulations of *S. peruvianum*

**Fig. S8** Relationship between heterozygosity and latitude in *S. chilense*

**Fig. S9**  $\partial a\partial i$  data and residuals

**Fig. S10** Comparison of parental and hybrid phenotypes

**Fig. S11** Flow cytometry data

**Fig. S12** Haplotypes of hybrid individuals identified with HAPMIX

**Fig. S13** Number of seed and seed-like structures for all crosses

**Fig. S14** ML phylogeny with all data

**Fig. S15** Phenotype of *S. chilense* LA0752

**Fig. S16** Location of wild tomato collections

**Fig. S17** Phenotypes of herbarium specimens

**Table S1** Information on the individual accessions used in this study

**Table S2** Data of accessions used only for  $\partial a\partial i$  analysis

**Table S3** Heterozygosity for all accessions

**Table S4** Maximum likelihood parameters returned by  $\partial a\partial i$

**Table S5** Number of seeds and seed-like structures for all individual crosses

### **Ploidy (C-value) determination by flow cytometry**

To determine if two cryptic hybrid individuals (LA1930, LA1932) were allopolyploids, they, two *S.per* (LA2732, LA1954), *S.chi*-LA2930, and two diploid *S. lycopersicum* controls were analyzed on the FACS Aria II Flow Cytometer. Leaf tissue from one individual from these accessions was chopped in 500  $\mu$ L of 15 mM PBS buffer containing 2 mM EDTA, 15 mM 2-Mercaptoethanol, 0.1% Triton X-100, 0.5 mM Spermine, 100  $\mu$ g/mL RNase, and 5  $\mu$ g/mL propidium iodide. The nuclei suspension was then run through a 50  $\mu$ m filter and the filtered nuclei were then immediately analyzed. A minimum of 10,000 nuclei from each accession were analyzed. Samples were normalized to the diploid *S. lycopersicum* controls. The flow cytometry data for all samples is shown in Fig. S12.

### **$\partial a \partial i$ Notes**

Our analysis using  $\partial a \partial i$  highlighted two informative problems. First, the number of singleton SNPs appeared to be underestimated, perhaps due to low sequencing coverage of these rare variants (Nielsen et al. 2011). We addressed this by masking singletons in the JSFS before running  $\partial a \partial i$ . Second, according to  $\partial a \partial i$ , too many high-frequency shared derived alleles were detected. This could result from ancestral state misidentification, and a misidentification rate of 1.1 – 1.5% in the outgroup could account for these high-frequency shared derived alleles. To address this potential problem, an additional outgroup misidentification rate parameter was added to the model.

According to the branching order in the coalescent analysis and the ML analysis using all data, the divergence of *S. chilense* predates the divergence between *S. peruvianum* and the Arc+Esc lineage. This is surprising and goes against what is known from morphology and the literature. However, a large degree of uncertainty on the branching order of these lineages is evident (for example, if taxa with >10% admixture are removed), and it is also difficult distinguish these patterns from a concurrent divergence of all three lineages (a true polytomy).

Therefore, we wanted to directly test four alternative evolutionary scenarios to help determine the branching order of *S. chilense*, *S. peruvianum*, and Arc+Esc. For this we used  $\partial a \partial i$  because it is able to estimate demographic parameters from a three-dimensional site frequency spectrum (Gutenkunst et al. 2009). The four alternative hypotheses are: (Arc+Esc, (*S. chilense*, *S. peruvianum*)), (*S. chilense*, (Arc+Esc, *S. peruvianum*)), (*S. peruvianum*, (*S. chilense*, Arc+Esc)), or simultaneous divergence (polytomy). The model written for this purpose had two ancestral splits (T1 and T2) which were both followed by growth in all populations. The time interval of T1 was restricted to 0 to estimate a simultaneous speciation event.

Unfortunately, the multispecies Arc+Esc lineage did not have an appropriate site frequency spectrum for demographic analysis in  $\partial a\partial i$ . As an alternative we downloaded 17 *S. pimpinellifolium* ('Esculentum group) accessions reported by Lin et al. 2014 (NCBI SRA SRP045767). These are described in Supplemental Table S2. All of these *S. pimpinellifolium* accessions were then used to represent the Arc+Esc group. After excluding the admixed individuals identified in STRUCTURE, the three-dimensional JSFS was derived from 92,939 synonymous variants with a nonzero MAF. Ten independent runs of 10,000 iterations and 10 bootstraps were computed for each scenario and the scenario with the highest composite log-likelihood was selected. The model with the highest composite likelihood was (Arc+Esc), (*S. chilense*, *S. peruvianum*)), supporting *S. chilense* and *S. peruvianum* as sister species:

| The four alternative demographic scenarios tested in $\partial a\partial i$ and the maximum log-likelihood returned from 10 independent runs from randomized starting parameters. |                                   |                                     |                        |                         |
|-----------------------------------------------------------------------------------------------------------------------------------------------------------------------------------|-----------------------------------|-------------------------------------|------------------------|-------------------------|
| Hypothesis                                                                                                                                                                        | <i>S. chilense</i> diverges first | <i>S. peruvianum</i> diverges first | Arc+Esc diverges first | Simultaneous divergence |
| Demographic scenario                                                                                                                                                              |                                   |                                     |                        |                         |
| Maximum log-likelihood                                                                                                                                                            | -20,538                           | -23,119                             | <b>-20,059</b>         | -22,026                 |

**Fig. S1. (a)** Number of reads mapping to the reference genome sequence for the 80 wild tomato accessions. The colored segment represents the proportion of reads uniquely aligning to the genome and the gray segment the proportion of reads non-uniquely aligned or not aligned. Mapping data for these and the additional accessions is in Supplemental Table S1. **(b)** Distribution of read coverage in the 80 libraries following mapping.

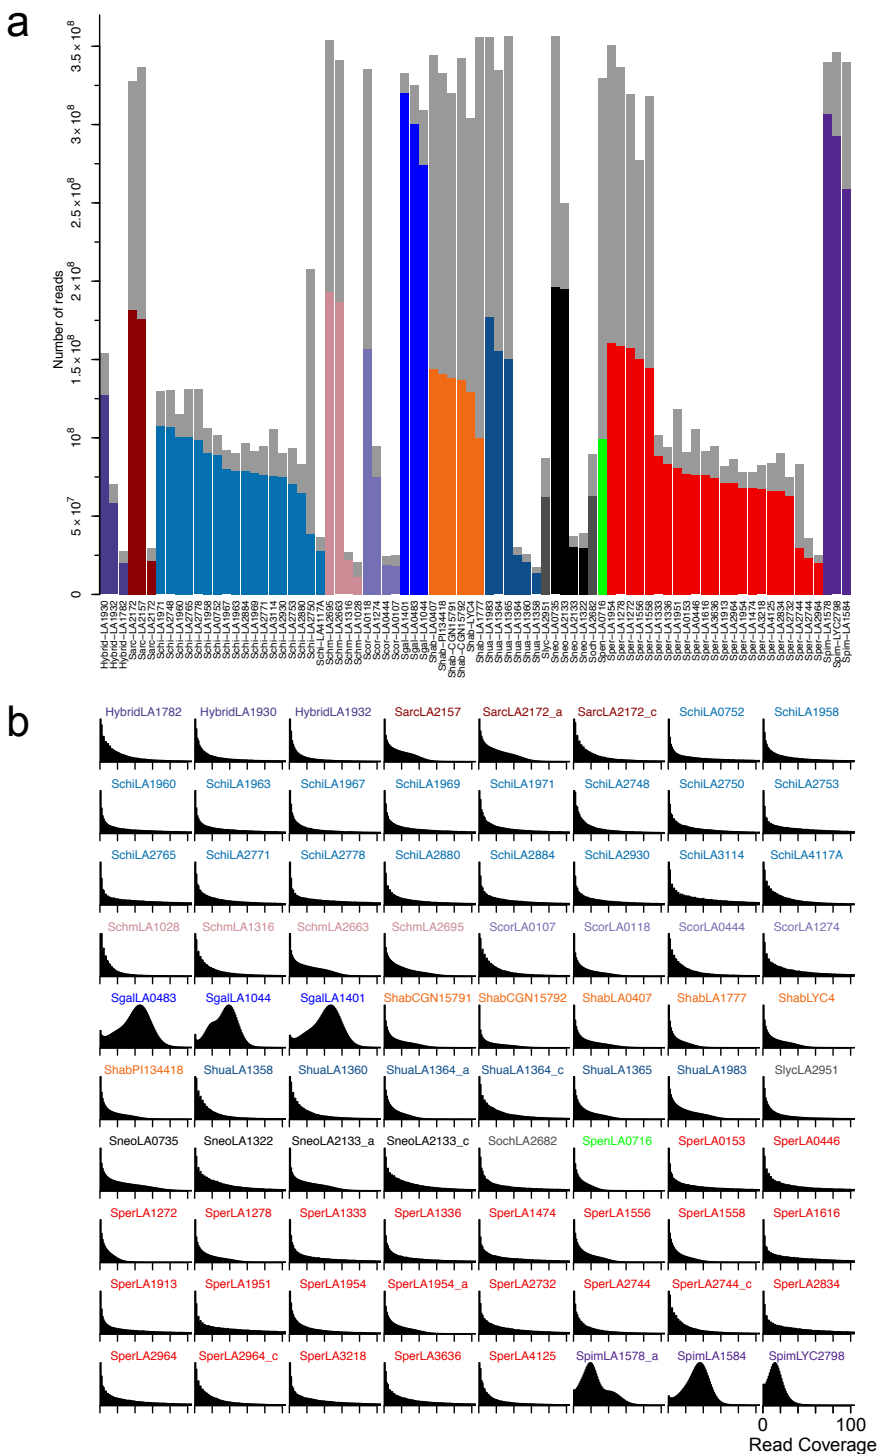

**Fig. S2.** Number of positions (y-axis) sequenced to a minimum coverage (x-axis) in all 80 individuals. The number of positions is divided into categories following the reference GFF file. Note that the number of positions sequenced to a minimum depth also includes all positions sequenced to a greater depth of coverage. For example, 527,655 positions were sequenced to  $\geq 10$  coverage but only 56,433 had a depth of 10. The remaining positions had a depth  $>10$ .

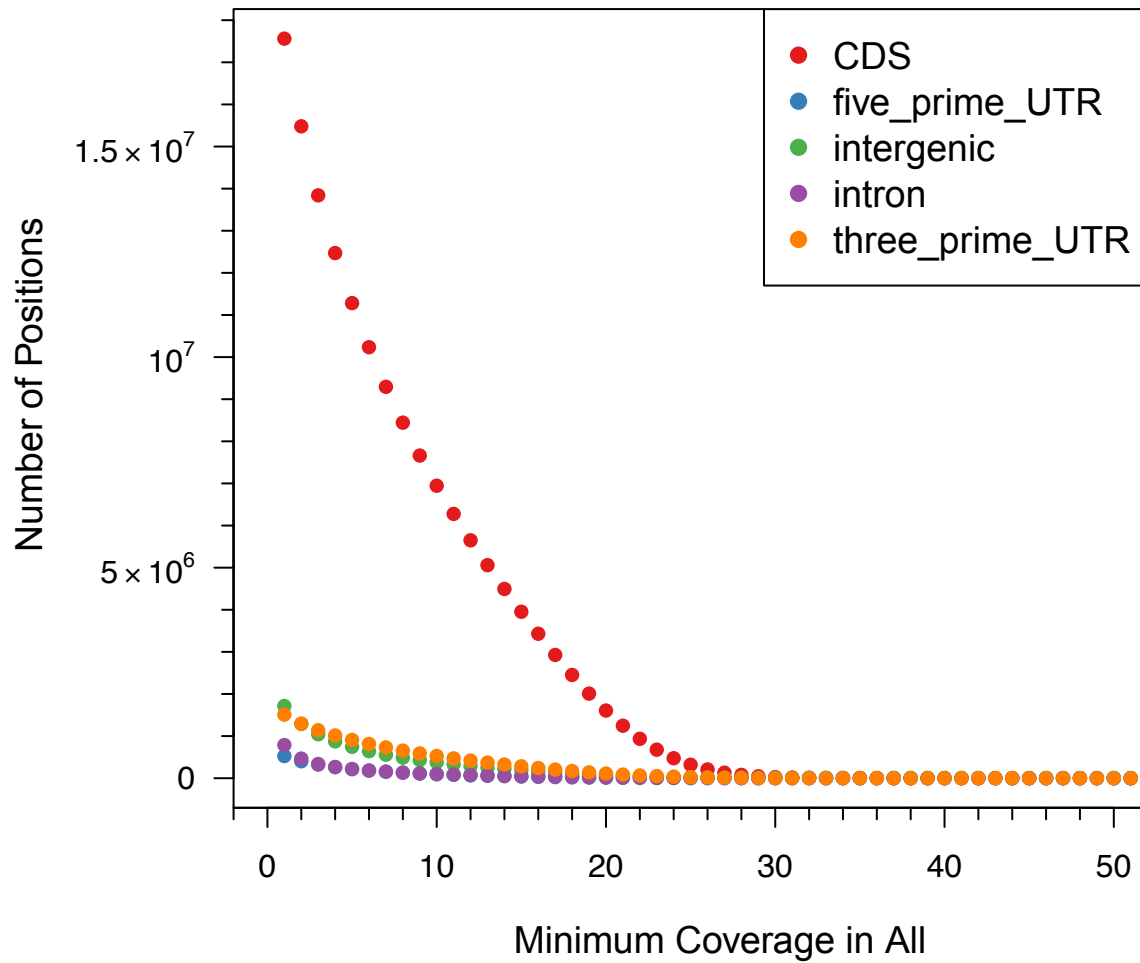

**Fig. S3.** Annotation and coverage in the high-quality variant dataset. (a) Number of variants assigned as 5'UTR, CDS (synonymous + nonsynonymous), intron, 3'UTR, and intergenic. The number of positions which change a start or stop codon and nonsense mutations are also given (b) Median depth of coverage at variable sites for the classes in (a). (c) The distribution of read depth at variable positions. Depth (from 0-250) is on the x-axis.

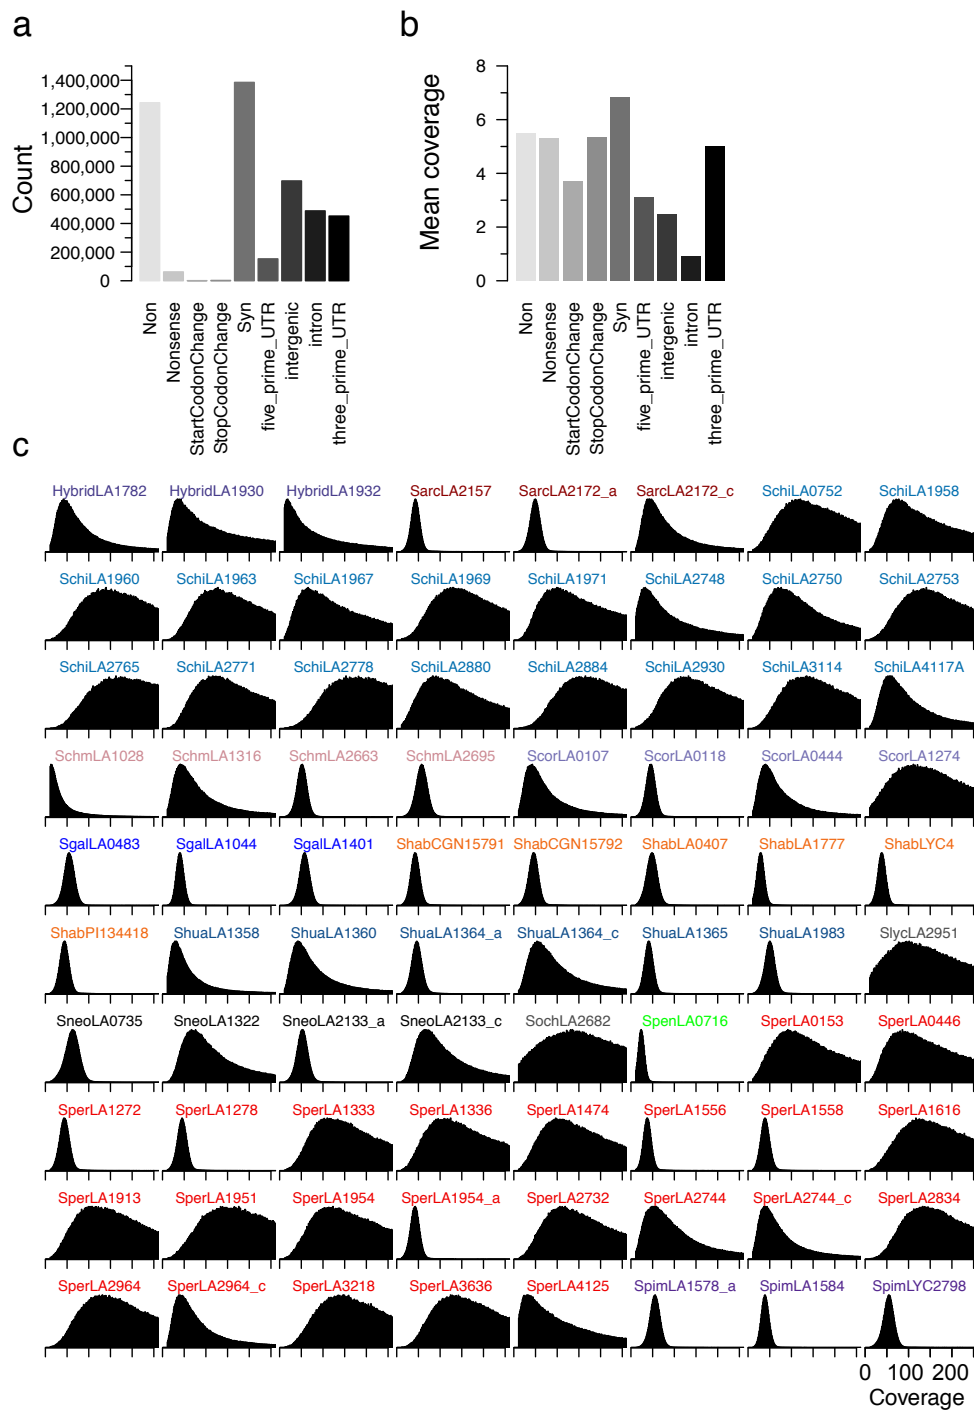

**Fig S4.** Principle component analysis of all accessions excluding the 'Hirsutum' and 'Lycopersicon' groups. The first principle component explained 29.98% of the variance and delineated *S. chilense* (*S.chi*) from the 'Arcanum' and 'Peruvianum' group species. Species abbreviations are given in Fig. 2.

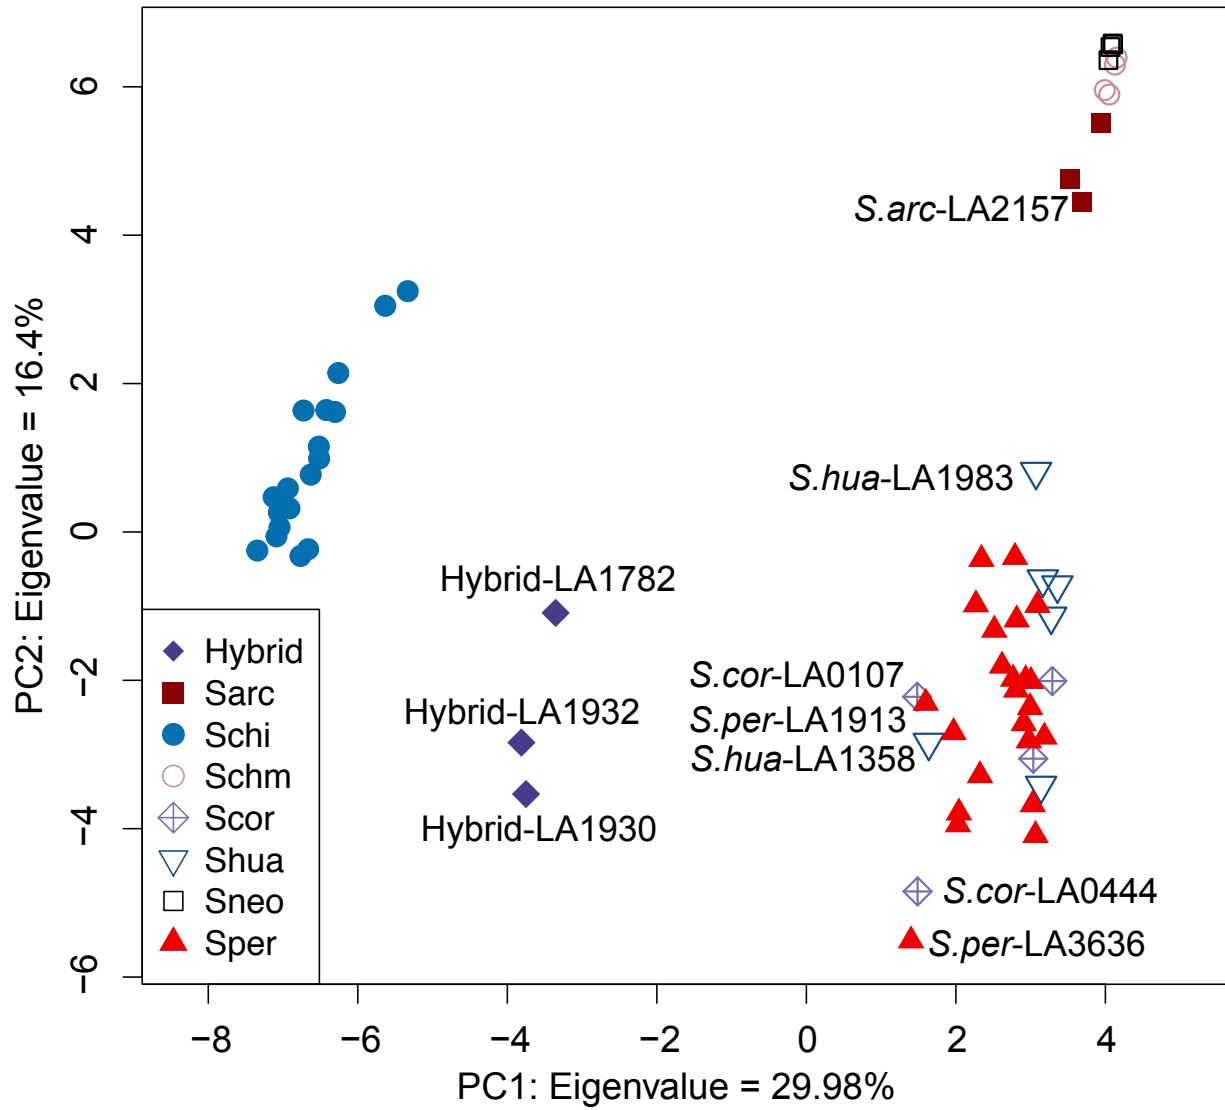

**Fig. S5.** Log-likelihood of the data from STRUCTURE. **(a)** The average log likelihood  $\pm$  s.d. over 10 runs (y-axis) modelled for  $K=1 - K=7$  (x-axis). **(b)** The average difference between successive likelihood values of  $K$ ,  $L'(K) = L(K) - L(K-1)$ . **(c)** The second order rate change of  $L'(K)$ ,  $|L''(K)| = |L'(K+1) - L'(K)|$ . **(d)** The ad hoc  $\Delta K$  statistic which is the average second order rate change ( $|L''(K)|$ ) divided by the standard deviation of  $L(K)$  [see Evanno *et al.* (2005) for full details]. The log likelihood and  $\Delta K$  both indicate that  $K=3$  is most likely.

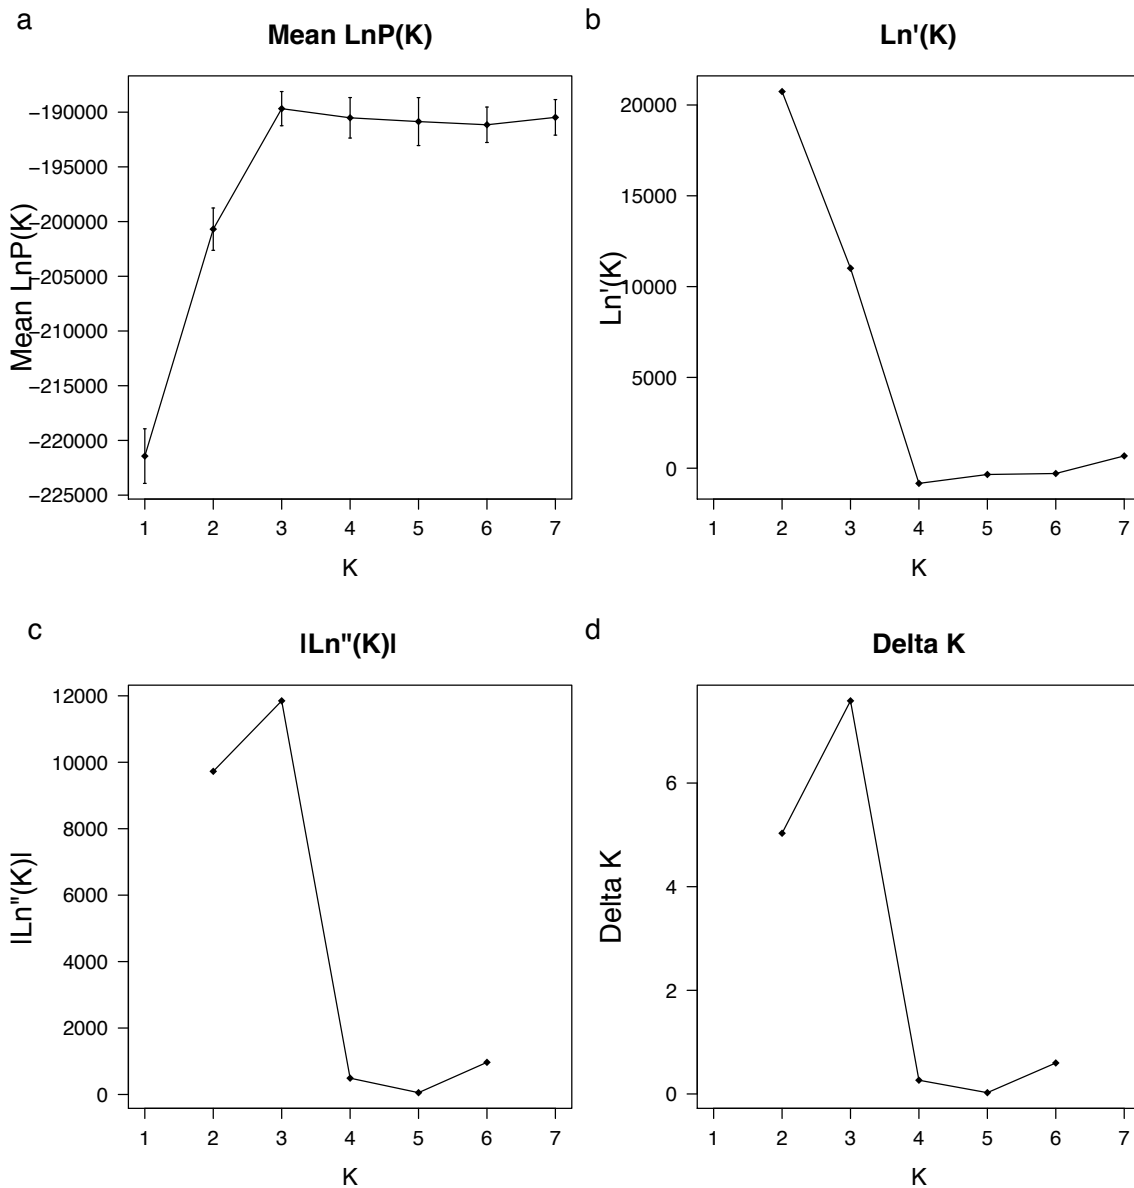



**Fig S6.** Heterozygosity per accession. Individual heterozygosity was calculated for each accession by dividing the number of heterozygous sites by the number of positions. For example, from the 4,866,729 bi-allelic polymorphisms 154,538 had  $\geq 10$  coverage and were heterozygous in *S.chi*-LA1958. These bi-allelic polymorphisms were drawn from the 34,617,016 positions with  $\geq 10$  coverage with  $\leq 50\%$  missing data. However, only 28,448,837 of the 34,617,016 positions had  $\geq 10$  coverage in *S.chi*-LA1958. Thus, the heterozygosity for this accession is 154,538 divided by 28,448,837.

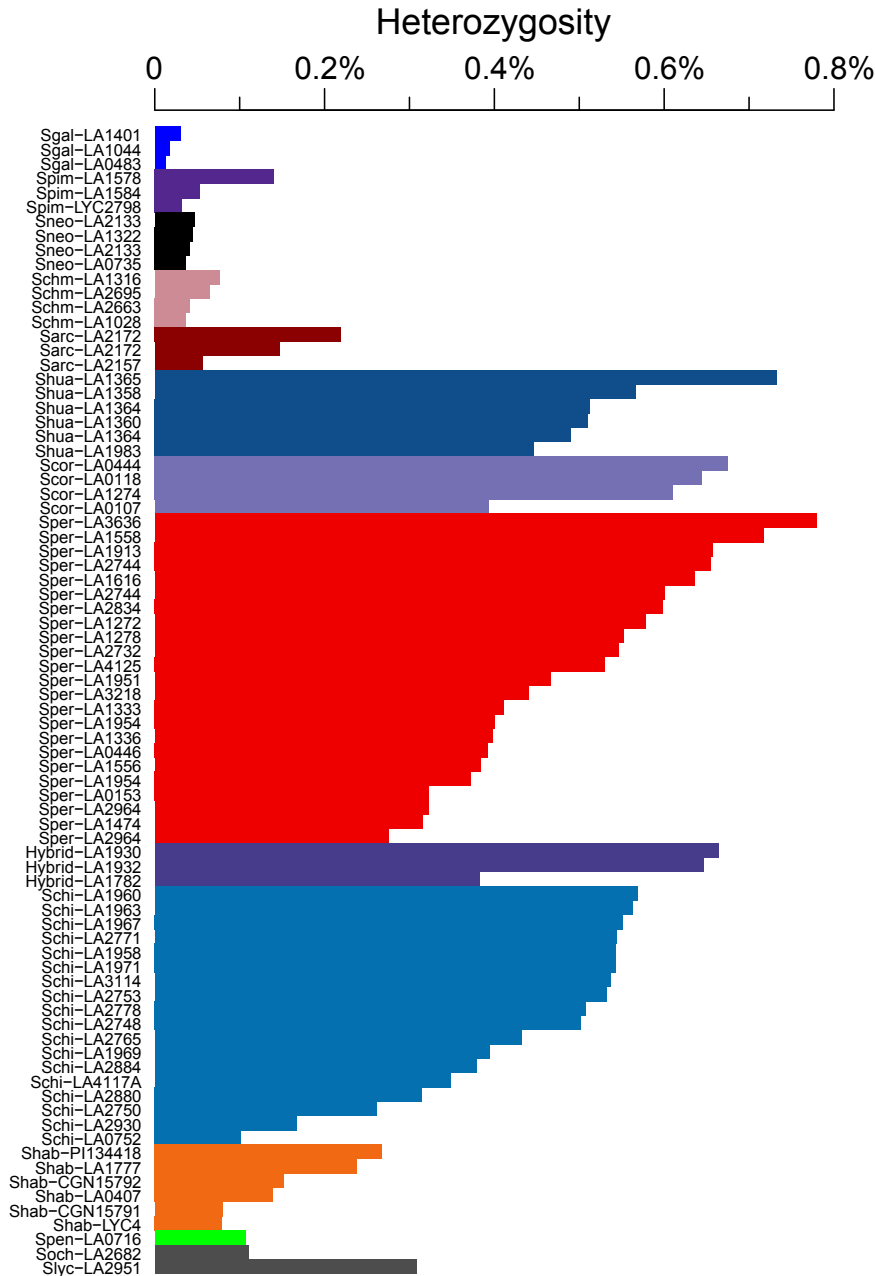

**Fig S7.**  $F_{ST}$  between species and subpopulations of *S. peruvianum*. The mean  $F_{ST}$  was calculated using VCFTools for all genes in pairwise comparisons between all populations shown. The species/accessions included in the Arcanum and Esculentum species groups is indicated in Fig. 2. For the *S.per* subpopulations were assigned based on the STRUCTURE result (Fig. 3) with a majority rule.

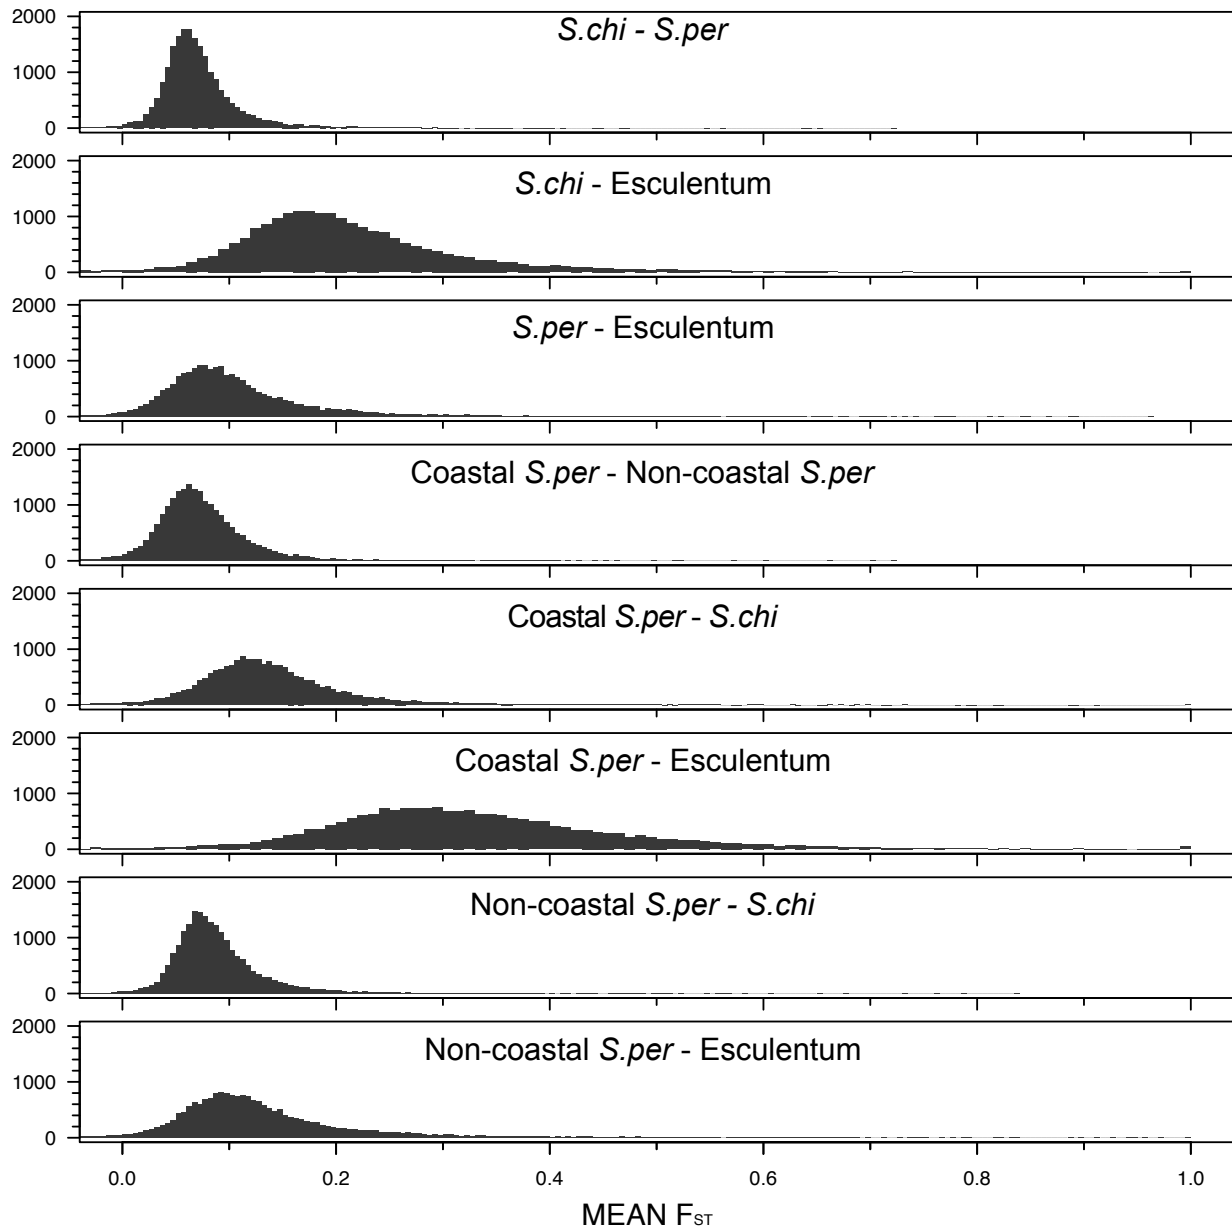

**Fig. S8.** The relationships of heterozygosity (x-axis) and latitude (y-axis) of *S. chilense* accessions. The anomolous *S. chilense* accession LA0752 is labelled.

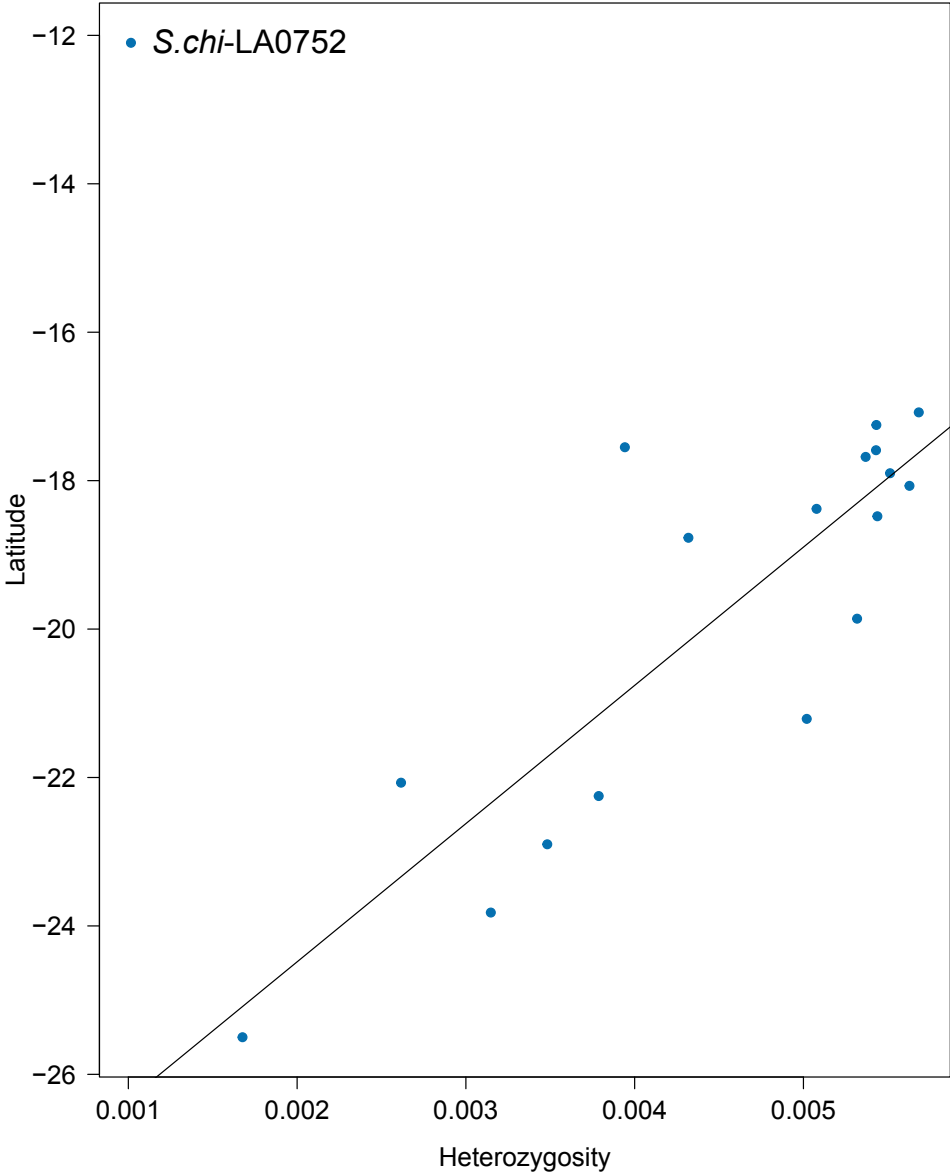

**Fig. S9.** Fit of the *S. chilense* and *S. peruvianum* speciation event to the model in  $\partial a \partial i$ . (a) The synonymous joint site frequency spectrum (JSFS) of *S. chilense* and *S. peruvianum*. (b) the modeled JSFS. (c) The residuals (data - model). (d) Histogram of the residual values showing a good model fit.

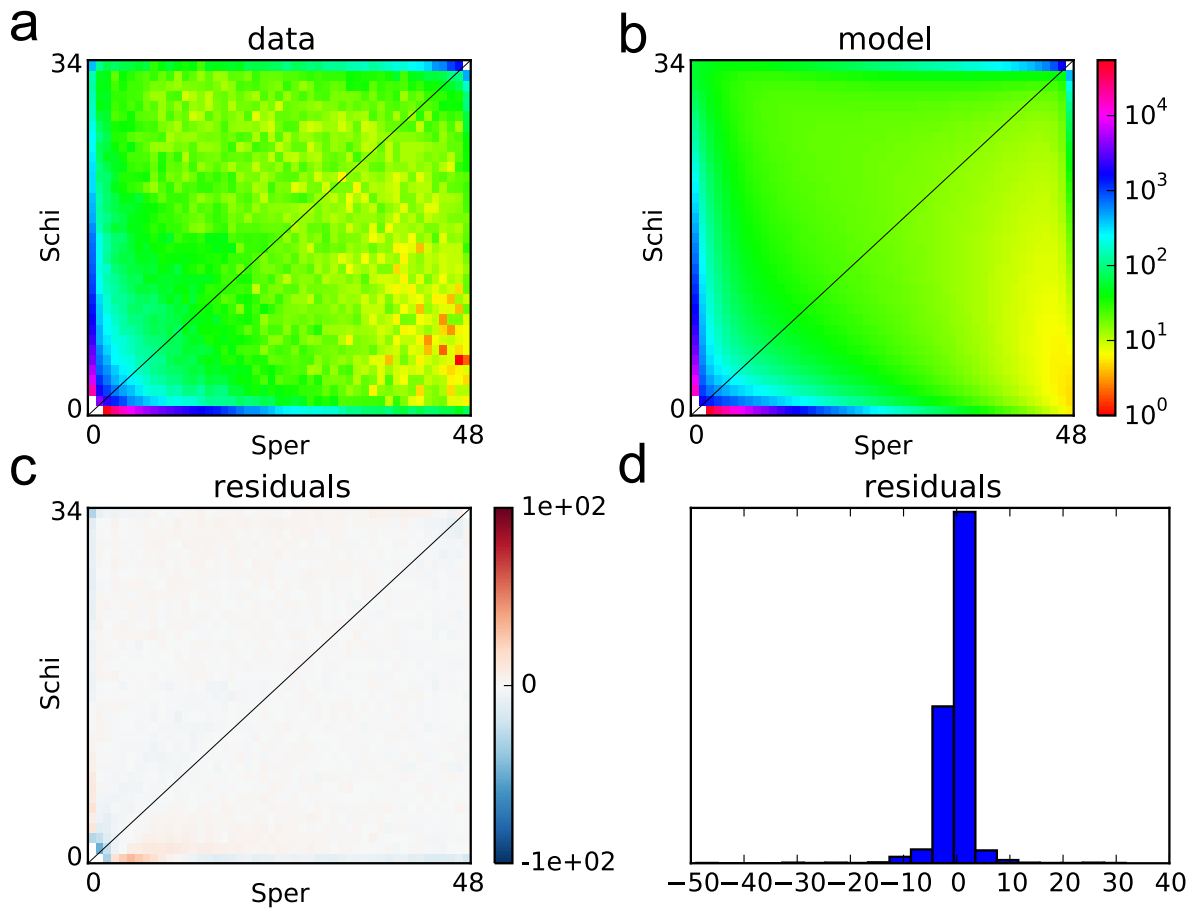

**Fig. S10.** Distinct phenotypes of hybrid populations LA1930 and LA1932. Approximately four seeds from LA1930, LA1932, *S.chi*-LA2930, *S.chi*-LA0572, three *S.per*, and one *S.cor* accession were germinated and grown together in a greenhouse in Düsseldorf, Germany (29 plants total). Measurements were taken after three months for all individuals and grouped by accession. Bars with no shared letters indicates significant difference between groups (pairwise t-test,  $P < 0.01$ ) and error bars show the s.e.m. Measurements for **(a)** Leaf length and **(b)** stem diameter were taken at nodes 1 through 10 for 3-5 individuals per accession. **(c)** The number of lateral branches >5 cm.

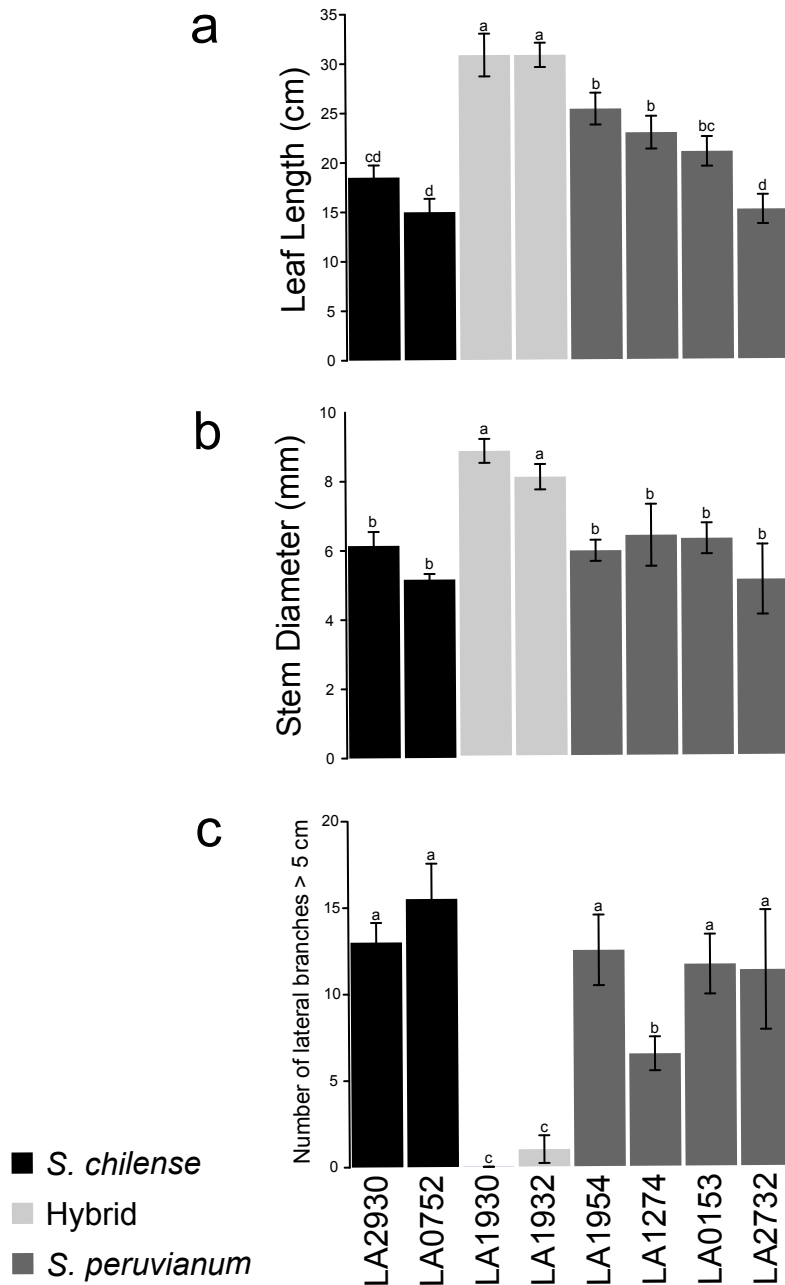

**Fig. S11.** Flow cytometry results. The two-dimensional plots show side scattered light (y-axis) and propidium iodide intensity (x-axis). The ploidy level gates were determined from the first wt tomato control and confirmed again with the same and a second diploid cultivated control.

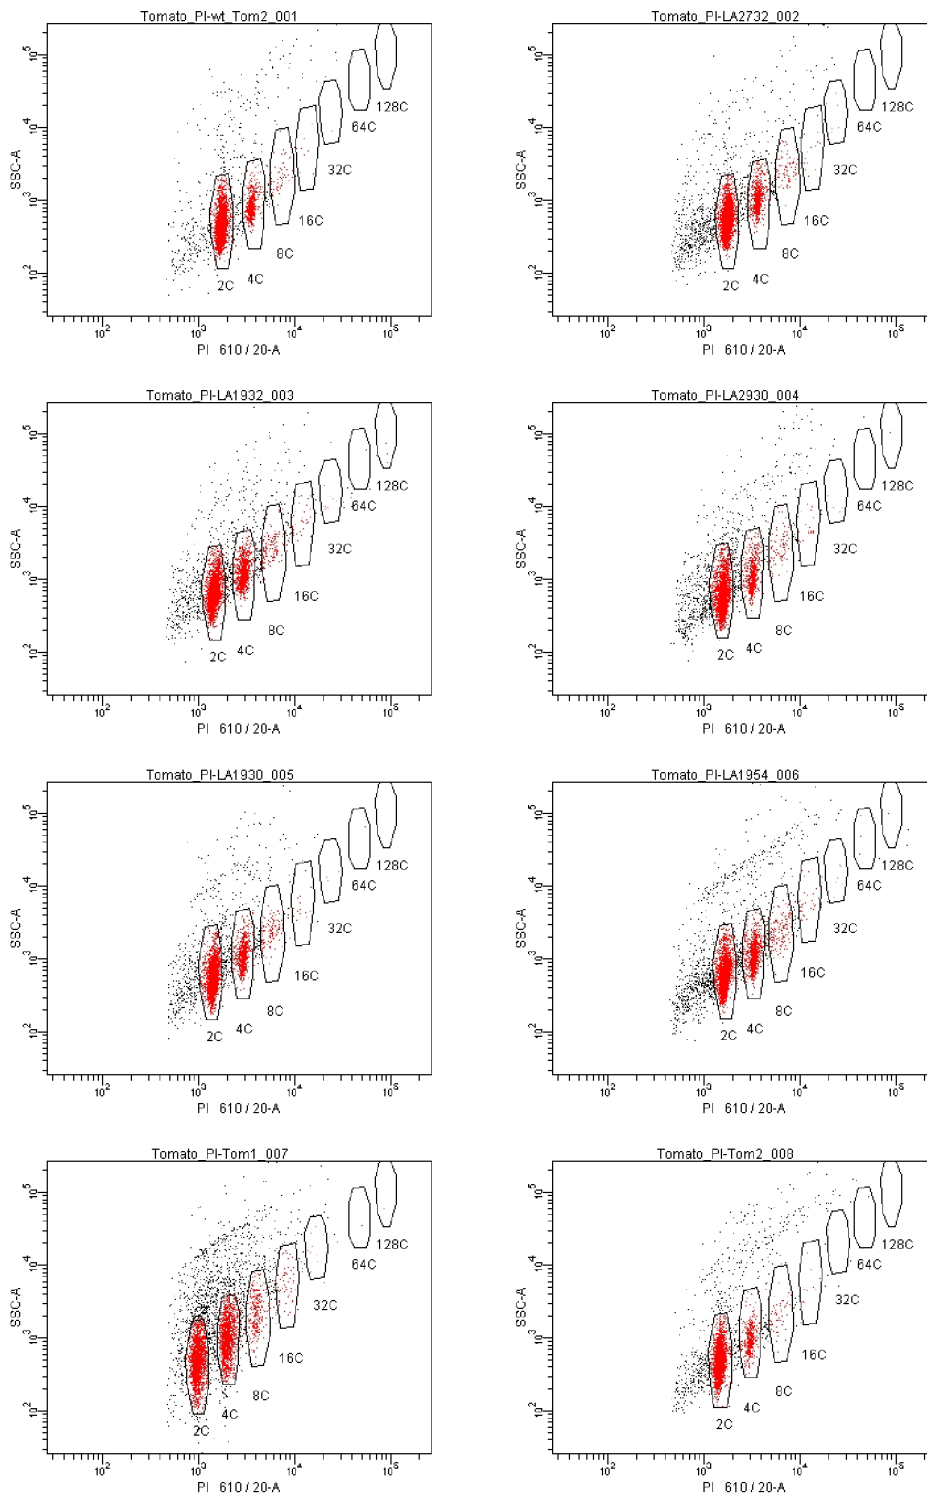

**Fig. S12.** Haplotype blocks identified in three hybrid individuals from HAPMIX. Parental haplotype blocks were identified in the three individual accessions identified as hybrids in this study. Blocks were assigned using all accessions from the parental species *S.chi* and *S.per*. Blocks were then plotted to the genomic position and colored depending on the parental species (red = *S.per* and blue = *S.chi*). Note that there is little coverage in non-genic regions for these accessions because it is RNAseq data, so the assignment of large blocks to *S.chi* in non-genic regions might be misleading. Data is shown for (a) LA1782, (b) LA1930, and (c) LA1932.

(a)

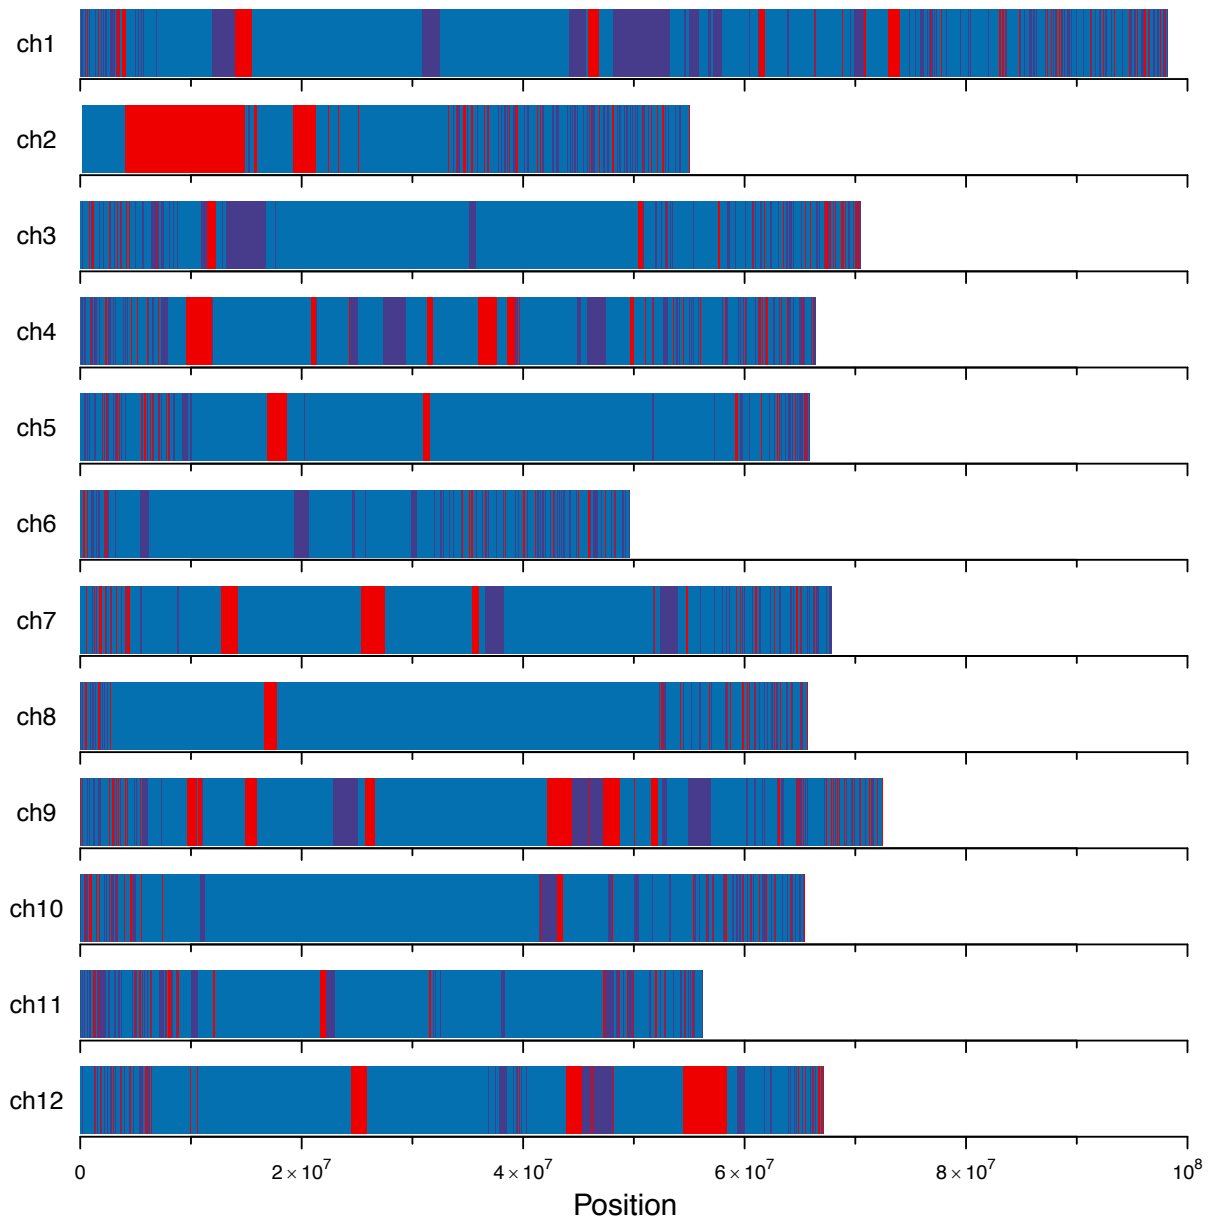

**(b)**

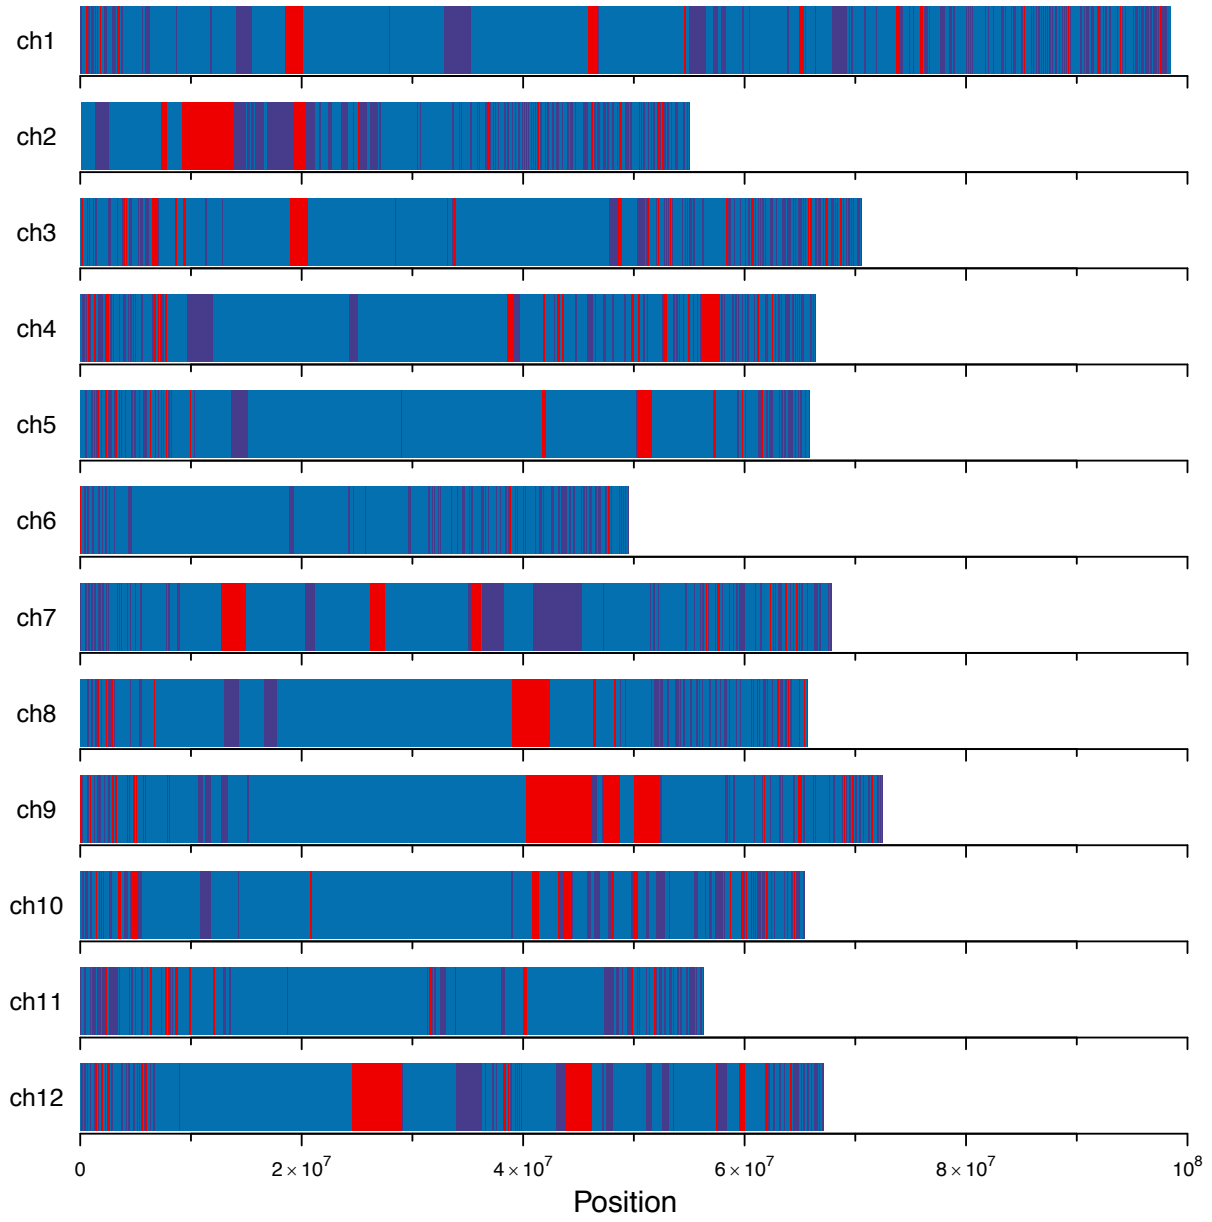



(c)

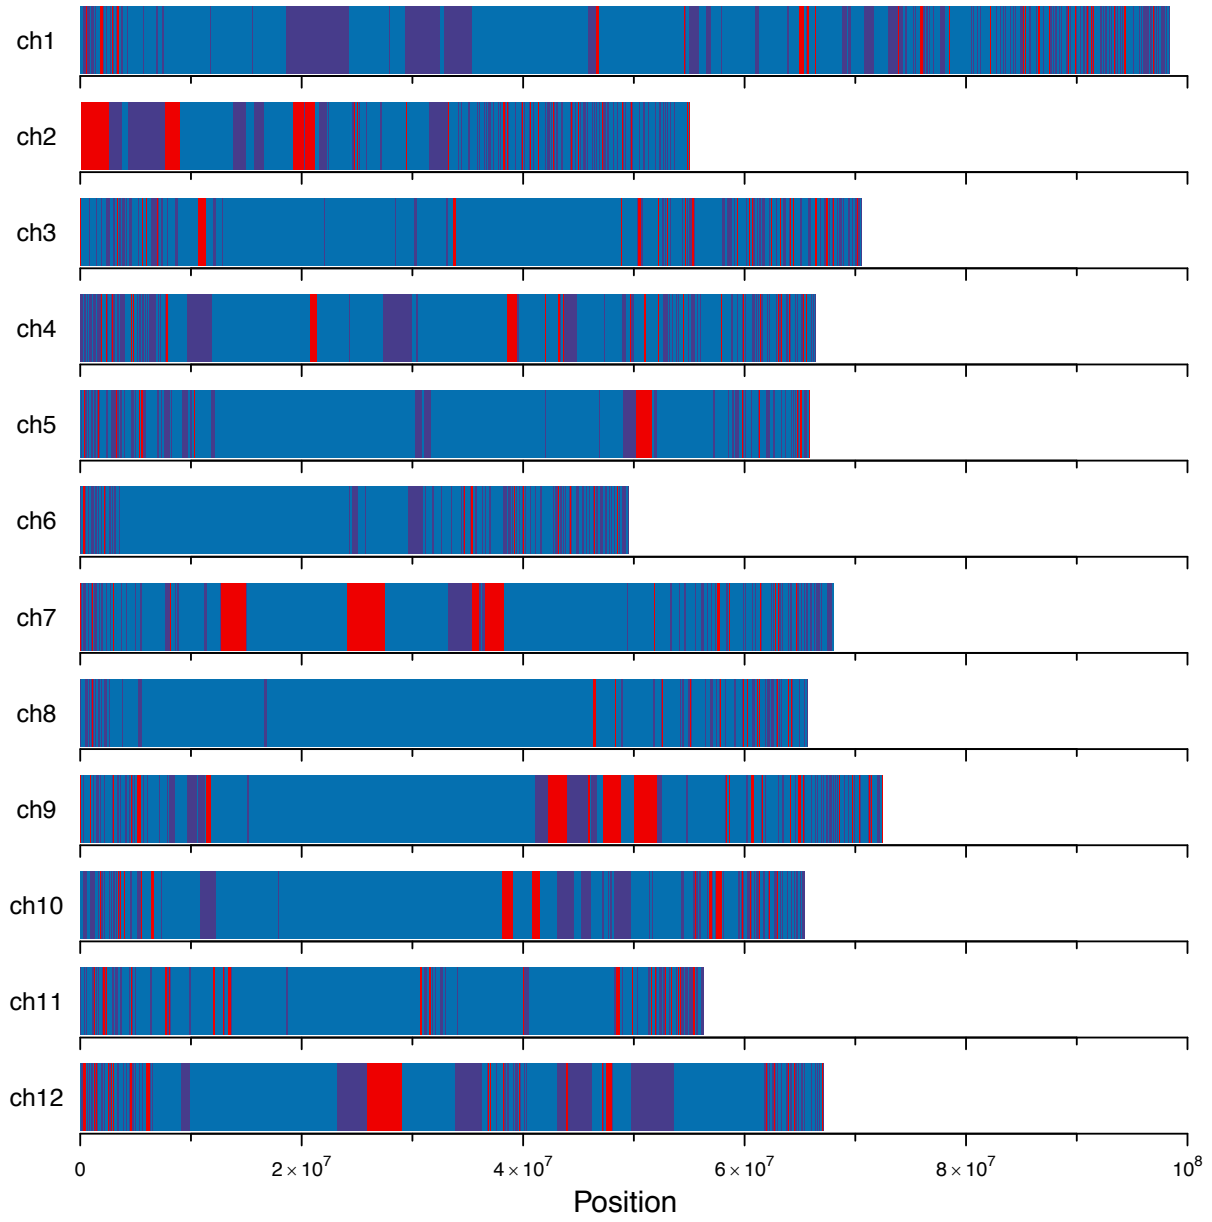

**Fig. S13.** Results of the crossing study. The number of seeds (top) and seed-like structures (bottom) for all crosses are shown as box and whisker plots. Crosses involving the hybrids are in blue (left), interspecific crosses are in green (middle) and intraspecific crosses are in black (right).

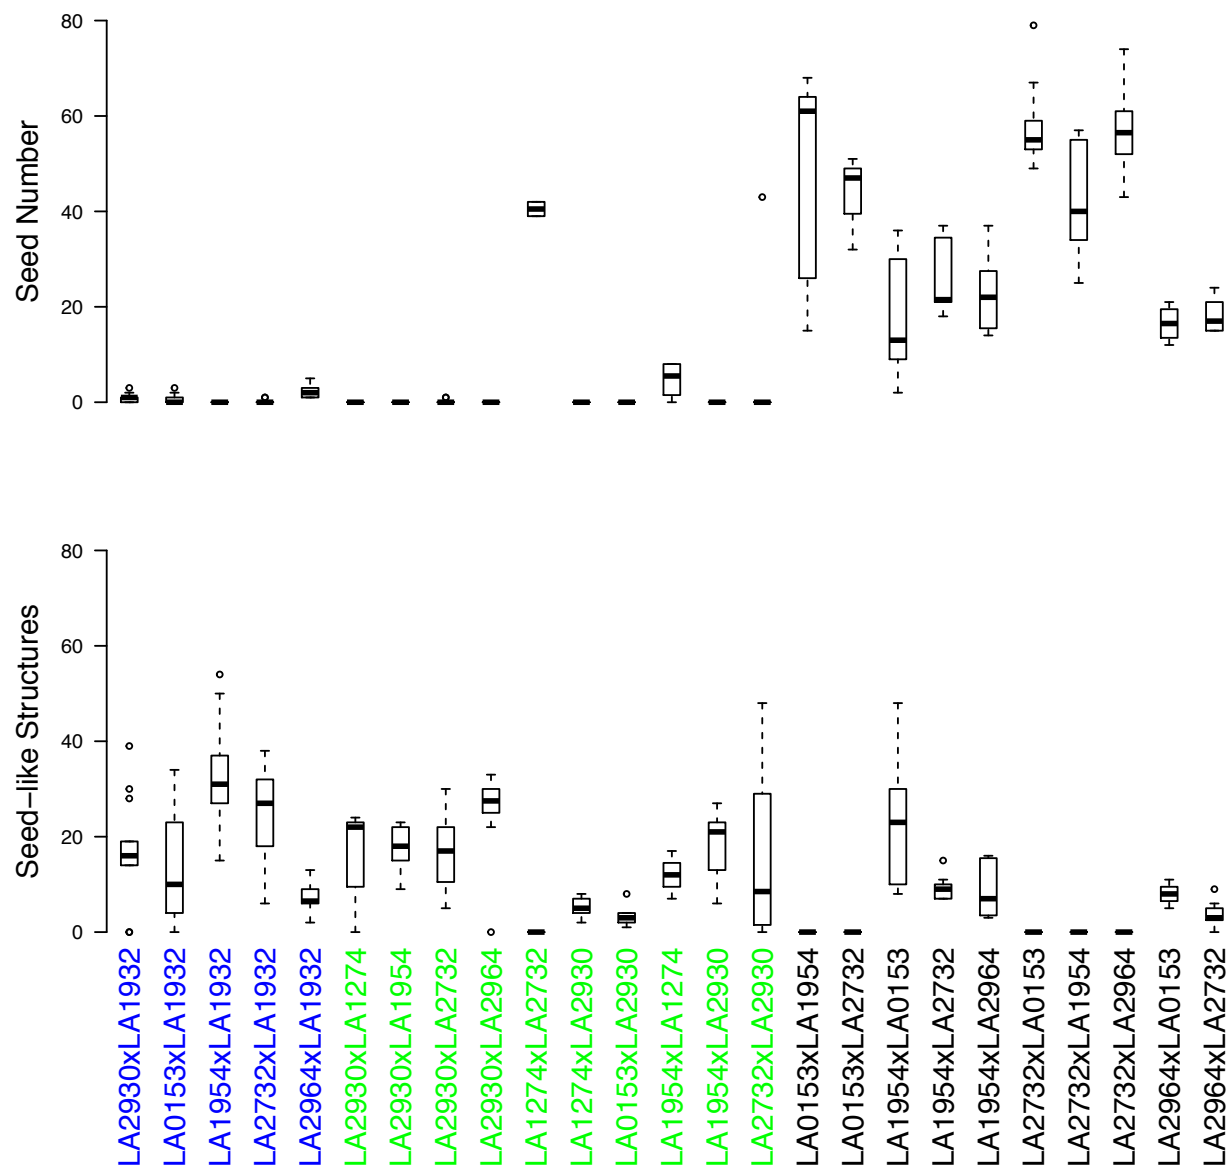

**Fig. S14.** Maximum-likelihood phylogeny with all accessions using 712,432 synonymous polymorphisms with less than 50% missing data.

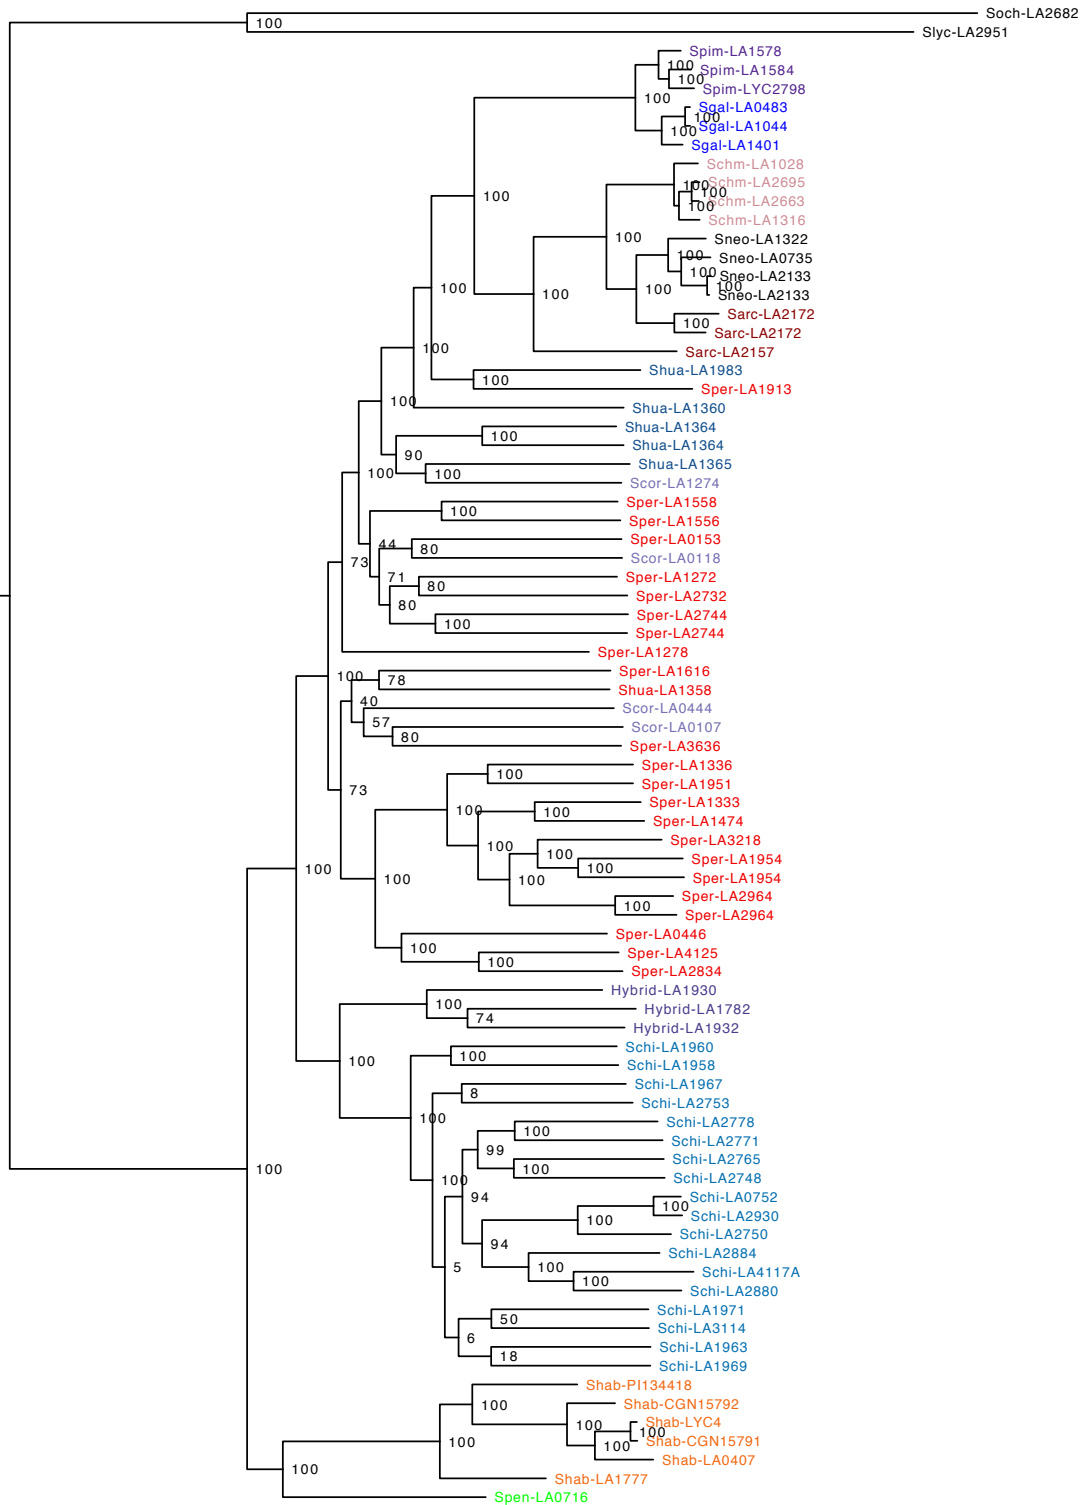

**Fig. S15.** Phenotype of the cryptic *S. chilense* populations LA0752. (a) Typical flower of *S.chi*-LA0752. (b) Typical leaflet of *S.chi*-LA0752 from several individuals. (c) Three-week-old individuals from *S.chi*-LA0752, *S. chilense* (LA2930), *S. peruvianum* (LA0153, LA1954 and LA2732), *S. corneliomulleri* (LA1272), and the two *S.chi* x *S.per* hybrid accessions (LA1930 and LA1932).

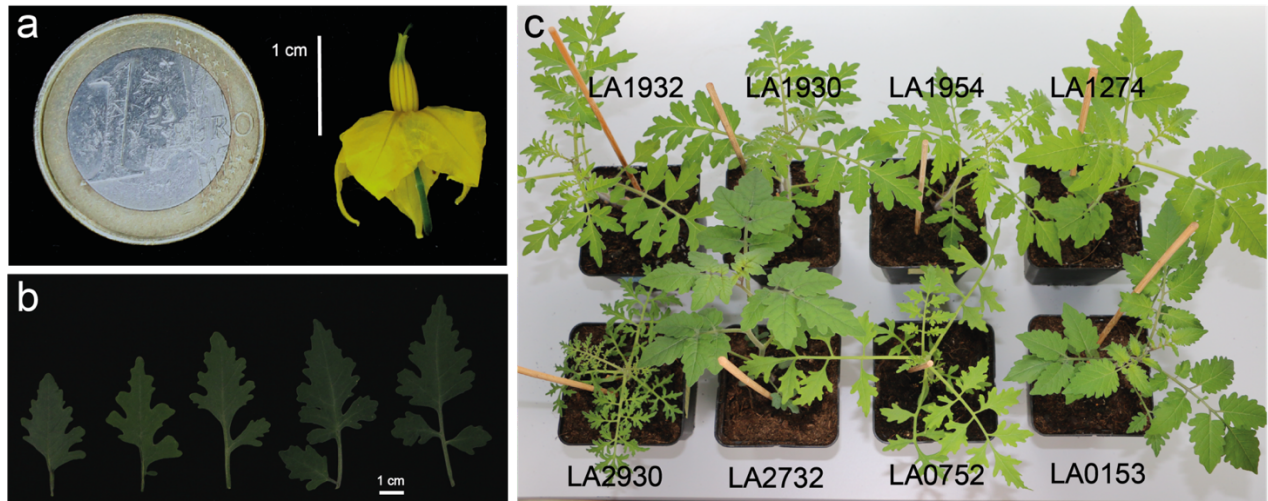

**Fig. S16.** Known distribution of *S. chilense*. (a) All known collections of *S. chilense* (dataset kindly provided by Sandra Knapp, Natural History Museum, London) show the discrete northern populations identified as hybrids in this study. *S.chi*-LA0752 is shown as the most northern *S. chilense* population. The 2004 collection sites of *S. chilense* (Roselius *et al.* 2005) are also shown (Nazca [NAZ], Tacna [TAC], Moquegua [MOQ], and Quicacha [QUI]). (b) Close up of the collection gap between *S. chilense* and hybrid individuals previously described as *S. chilense*. There are collections from other species within the gap which begins around 72° (indicated by a line).

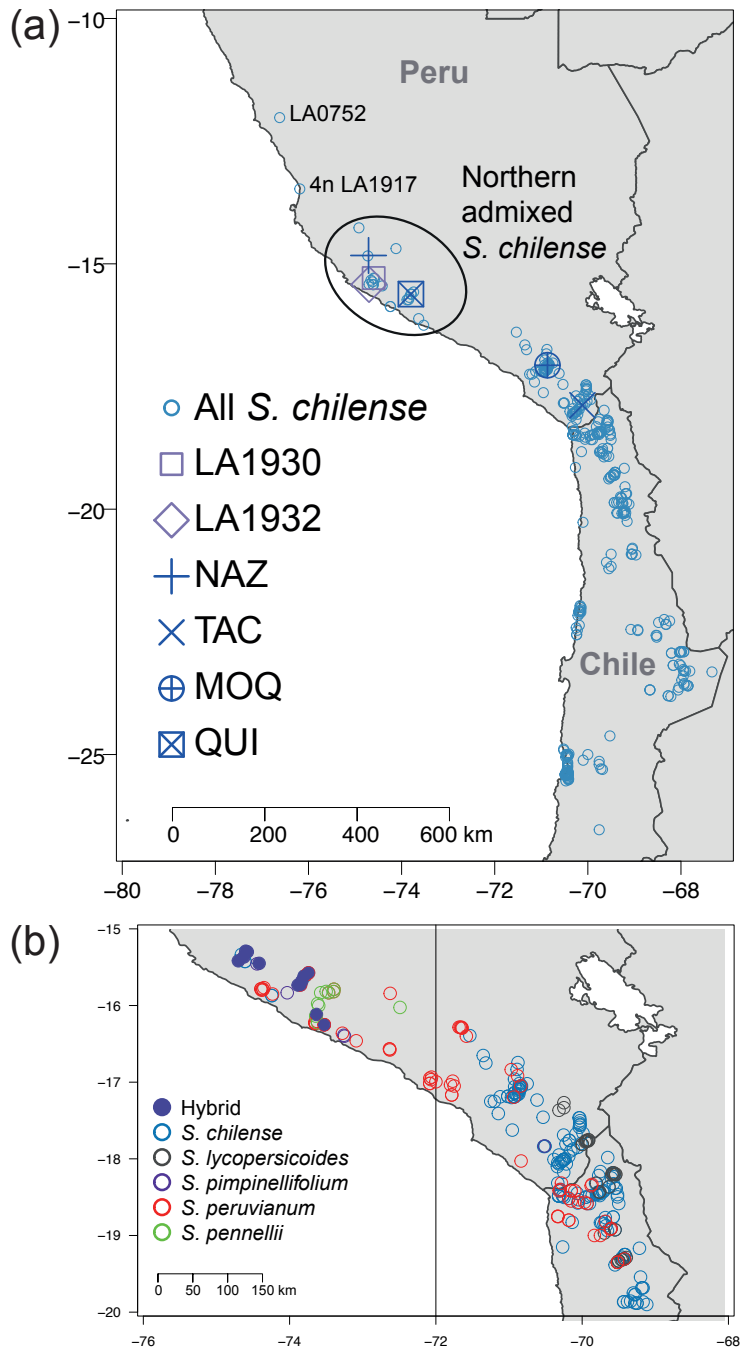

**Fig. S17.** Herbarium voucher specimens from Roselius *et al.* 2005. The location of these collections is indicated in Fig. S16. Note the similar phenotype of QUI and *S. chilense* NAZ, and the similarity of these collections to LA1930 and LA1932 in Fig. 6.

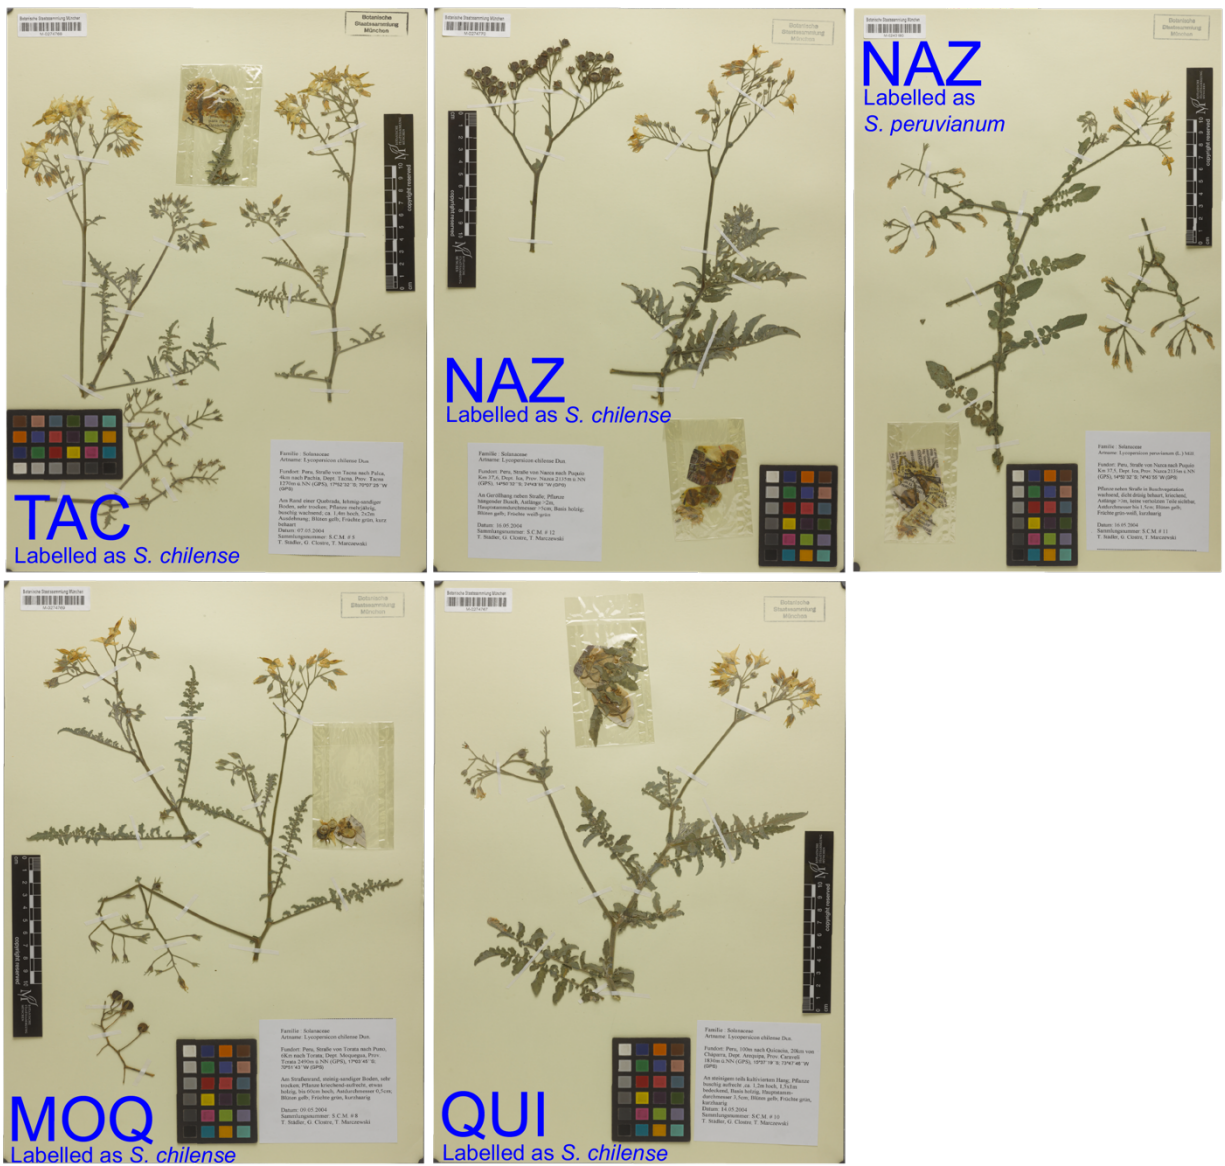

**Supplemental Table 1.** Details of the populations and data analyzed in this study.

| Id       | Species            | Species Abbreviation | Study | Duplicate | # Seed-Expansion Generations | # Total Reads | # Positions with MinDepth $\geq 10$ | # Aligned Reads | % Aligned | Province          | Country | Elevation | Latitude | Longitude | Mating System  |
|----------|--------------------|----------------------|-------|-----------|------------------------------|---------------|-------------------------------------|-----------------|-----------|-------------------|---------|-----------|----------|-----------|----------------|
| LA1782   | Hybrid             | Hybrid               | c     |           |                              | 27407970      | 56256043                            | 20,234,125      | 74%       | Arequipa          | Peru    |           | -15.36   | -74.62    | Allogamous-SI  |
| LA1930   | Hybrid             | Hybrid               |       |           | 2                            | 154021324     | 55483585                            | 127,682,186     | 83%       | Arequipa          | Peru    | 500       | -15.29   | -74.6     | Allogamous-SI  |
| LA1932   | Hybrid             | Hybrid               |       |           | 3                            | 70286604      | 41652129                            | 58,739,548      | 84%       | Arequipa          | Peru    | 1100      | -15.42   | -74.7     | Allogamous-SI  |
| LA2157   | S. arcanum         | S.arc                | a     |           |                              | 336528946     | 269008348                           | 175,818,877     | 52%       | Cajamarca         | Peru    | 1600      | -6.51    | -78.81    | Facultative-SC |
| LA2172   | S. arcanum         | S.arc                | a     | YES       |                              | 327920754     | 286177531                           | 181,859,614     | 55%       | Cajamarca         | Peru    |           | -6       | -78.91    | Allogamous-SI  |
| LA2172   | S. arcanum         | S.arc                | c     | YES       |                              | 29277492      | 55365171                            | 21,413,972      | 73%       | Cajamarca         | Peru    |           | -6       | -78.91    | Allogamous-SI  |
| LA0752   | S. chilense        | S.chi                |       |           | 5                            | 101970490     | 70492417                            | 89,227,601      | 88%       | Lima              | Peru    | 1200      | -12.1    | -76.6     | Allogamous-SI  |
| LA1958   | S. chilense        | S.chi                |       |           | 2                            | 106082222     | 63533072                            | 90,323,189      | 85%       | Moquegua          | Peru    | 1250      | -17.25   | -71.25    | Allogamous-SI  |
| LA1960   | S. chilense        | S.chi                |       |           | 2                            | 114906258     | 71767018                            | 100,616,993     | 88%       | Moquegua          | Peru    | 1850      | -17.08   | -70.87    | Allogamous-SI  |
| LA1963   | S. chilense        | S.chi                |       |           | 1                            | 90304024      | 69548517                            | 78,906,333      | 87%       | Tacna             | Peru    | 200       | -18.07   | -70.32    | Allogamous-SI  |
| LA1967   | S. chilense        | S.chi                |       |           | 2                            | 92496720      | 57229647                            | 80,442,070      | 87%       | Tacna             | Peru    | 1000      | -17.9    | -70.16    | Allogamous-SI  |
| LA1969   | S. chilense        | S.chi                |       |           | 3                            | 91197178      | 68639340                            | 77,708,686      | 85%       | Tacna             | Peru    | 3250      | -17.55   | -70.03    | Allogamous-SI  |
| LA1971   | S. chilense        | S.chi                |       |           | 3                            | 129813792     | 64394111                            | 107,887,801     | 83%       | Tacna             | Peru    | 3150      | -17.59   | -70.04    | Allogamous-SI  |
| LA2748   | S. chilense        | S.chi                |       |           | 3                            | 130209336     | 43278704                            | 106,619,009     | 82%       | Tarapaca          | Chile   | 800       | -21.21   | -69.55    | Allogamous-SI  |
| LA2750   | S. chilense        | S.chi                |       |           | 2                            | 207655754     | 63160144                            | 38,750,231      | 19%       | Antofagasta       | Chile   | 300       | -22.07   | -70.16    | Allogamous-SI  |
| LA2753   | S. chilense        | S.chi                |       |           | 2                            | 93241972      | 77690255                            | 70,635,380      | 76%       | Tarapaca          | Chile   | 1650      | -19.86   | -69.34    | Allogamous-SI  |
| LA2765   | S. chilense        | S.chi                |       |           | 2                            | 130974634     | 81499570                            | 100,558,213     | 77%       | Arica and         | Chile   | 2400      | -18.77   | -69.68    | Allogamous-SI  |
| LA2771   | S. chilense        | S.chi                |       |           | 4                            | 94589440      | 68362578                            | 76,334,713      | 81%       | Arica and         | Chile   | 1800      | -18.48   | -69.87    | Allogamous-SI  |
| LA2778   | S. chilense        | S.chi                |       |           | 3                            | 131261078     | 80666920                            | 98,948,038      | 75%       | Arica and         | Chile   | 2900      | -18.38   | -69.55    | Allogamous-SI  |
| LA2880   | S. chilense        | S.chi                |       |           | 3                            | 82840240      | 65348571                            | 64,874,285      | 78%       | Antofagasta       | Chile   | 2500      | -23.82   | -68.22    | Allogamous-SI  |
| LA2884   | S. chilense        | S.chi                |       |           | 3                            | 96468832      | 74182929                            | 78,708,109      | 82%       | Antofagasta       | Chile   | 2900      | -22.25   | -68.36    | Allogamous-SI  |
| LA2930   | S. chilense        | S.chi                |       |           | 2                            | 90023102      | 68485886                            | 74,777,787      | 83%       | Antofagasta       | Chile   | 550       | -25.5    | -70.42    | Allogamous-SI  |
| LA3114   | S. chilense        | S.chi                |       |           | 2                            | 105516090     | 76953459                            | 75,527,578      | 72%       | Tacna             | Peru    | 2960      | -17.68   | -70.08    | Allogamous-SI  |
| LA4117A  | S. chilense        | S.chi                | c     |           |                              | 36321890      | 62670271                            | 27,729,862      | 76%       | Antofagasta       | Chile   | 3540      | -22.9    | -67.94    | Allogamous-SI  |
| LA1028   | S. chmielewskii    | S.chm                | c     |           |                              | 20718540      | 32504920                            | 11,328,013      | 55%       | Apurimac          | Peru    | 3000      | -13.88   | -73.01    | Facultative-SC |
| LA1316   | S. chmielewskii    | S.chm                | c     |           |                              | 27282862      | 55100912                            | 22,331,541      | 82%       | Ayacucho          | Peru    | 2920      | -13.39   | -73.92    | Facultative-SC |
| LA2663   | S. chmielewskii    | S.chm                | a     |           |                              | 341164730     | 292981762                           | 187,068,096     | 55%       | Cusco             | Peru    | 2500      | -13.7    | -71.99    | Facultative-SC |
| LA2695   | S. chmielewskii    | S.chm                | a     |           |                              | 354078446     | 257609756                           | 193,294,895     | 55%       | Cusco             | Peru    | 2300      | -13.96   | -71.76    | Facultative-SC |
| LA0107   | S. corneliomulleri | S.cor                | c     |           |                              | 25207286      | 52928891                            | 18,464,348      | 73%       | Lima              | Peru    | 60        | -13.01   | -76.38    | Allogamous-SI  |
| LA0118   | S. corneliomulleri | S.cor                | a     |           |                              | 335487318     | 196520686                           | 156,957,493     | 47%       |                   |         |           |          |           | Allogamous-SI  |
| LA0444   | S. corneliomulleri | S.cor                | c     |           |                              | 24552910      | 52196803                            | 18,856,869      | 77%       | Ica               | Peru    | 100       | -13.43   | -76.13    | Allogamous-SI  |
| LA1274   | S. corneliomulleri | S.cor                |       |           | 2                            | 94550118      | 66437945                            | 75,389,974      | 80%       | Lima              | Peru    | 1440      | -11.46   | -76.9     | Allogamous-SI  |
| LA0483   | S. galapagense     | S.gal                | a     |           |                              | 325259616     | 653076473                           | 300,903,738     | 93%       | Galapagos Islands | Ecuador |           | -0.37    | -91.6     | Autogamous-SC  |
| LA1044   | S. galapagense     | S.gal                | a     |           |                              | 309118016     | 662395936                           | 274,029,941     | 89%       | Galapagos Islands | Ecuador |           | -0.28    | -90.55    | Autogamous-SC  |
| LA1401   | S. galapagense     | S.gal                | a     |           |                              | 332617086     | 663119779                           | 319,895,925     | 96%       | Galapagos Islands | Ecuador | 5         | -0.24    | -91.39    | Autogamous-SC  |
| CGN15791 | S. habrochaites    | S.hab                | a     |           |                              | 320002236     | 155245404                           | 138,286,664     | 43%       |                   |         |           |          |           |                |
| CGN15792 | S. habrochaites    | S.hab                | a     |           |                              | 342613468     | 155762000                           | 137,105,706     | 40%       |                   |         |           |          |           |                |
| LA0407   | S. habrochaites    | S.hab                | a     |           |                              | 344461004     | 154612310                           | 144,036,116     | 42%       | Guayas            | Ecuador | 70        | -2.18    | -79.91    | Facultative-SC |
| LA1777   | S. habrochaites    | S.hab                | a     |           |                              | 355583114     | 107272689                           | 99,785,409      | 28%       | Ancash            | Peru    | 3216      | -9.55    | -77.67    | Allogamous-SI  |
| LYC4     | S. habrochaites    | S.hab                | a     |           |                              | 304186072     | 153083781                           | 129,451,667     | 43%       |                   |         |           |          |           |                |
| PI134418 | S. habrochaites    | S.hab                | a     |           |                              | 333175862     | 149837952                           | 141,004,224     | 42%       |                   |         |           |          |           |                |
| LA1358   | S. huaylasense     | S.hua                | c     |           |                              | 17653244      | 46515260                            | 13,994,568      | 79%       | Ancash            | Peru    | 750       | -9.53    | -77.96    | Allogamous-SI  |
| LA1360   | S. huaylasense     | S.hua                | c     |           |                              | 25716052      | 54684140                            | 20,772,720      | 81%       | Ancash            | Peru    | 1490      | -9.54    | -77.93    | Allogamous-SI  |
| LA1364   | S. huaylasense     | S.hua                | a     | YES       |                              | 334812164     | 158063838                           | 155,785,273     | 47%       | Ancash            | Peru    | 2920      | -10.13   | -77.39    | Allogamous-SI  |
| LA1364   | S. huaylasense     | S.hua                | c     | YES       |                              | 30423044      | 61774387                            | 25,354,397      | 83%       | Ancash            | Peru    | 2920      | -10.13   | -77.39    | Allogamous-SI  |
| LA1365   | S. huaylasense     | S.hua                | a     |           |                              | 356531462     | 193579086                           | 150,431,862     | 42%       | Ancash            | Peru    | 2450      | -10.16   | -77.43    | Allogamous-SI  |
| LA1983   | S. huaylasense     | S.hua                | a     |           |                              | 355914006     | 253148108                           | 177,188,003     | 50%       | Ancash            | Peru    | 940       | -8.69    | -77.97    | Allogamous-SI  |
| LA2951   | S. lycopersicoides | S.lyc                |       |           | 4                            | 87246466      | 46040360                            | 62,720,955      | 72%       | Tarapaca          | Chile   | 2200      | -19.32   | -69.45    | Allogamous-SI  |

|         |                            |       |   |     |   |           |           |             |     |             |         |      |        |        |                |
|---------|----------------------------|-------|---|-----|---|-----------|-----------|-------------|-----|-------------|---------|------|--------|--------|----------------|
| LA0735  | <i>S. neorickii</i>        | S.neo | a |     |   | 356305676 | 287714940 | 196,633,336 | 55% | Huanuco     | Peru    |      | -10.4  | -76.2  | Autogamous-SC  |
| LA1322  | <i>S. neorickii</i>        | S.neo | c |     |   | 38679884  | 69960549  | 29,641,067  | 77% | Cusco       | Peru    | 2380 | -13.45 | -72.43 | Autogamous-SC  |
| LA2133  | <i>S. neorickii</i>        | S.neo | a | YES |   | 249439256 | 288126468 | 195,162,489 | 78% | Azuay       | Ecuador | 1980 | -3.4   | -79.18 | Autogamous-SC  |
| LA2133  | <i>S. neorickii</i>        | S.neo | c | YES |   | 37045366  | 71293598  | 30,268,114  | 82% | Azuay       | Ecuador | 1980 | -3.4   | -79.18 | Autogamous-SC  |
| LA2682  | <i>S. ochranthum</i>       | S.och |   |     | 1 | 89755404  | 56376314  | 63,004,248  | 70% | Cusco       | Peru    | 2500 | -13.63 | -72.24 | Allogamous-SI  |
| LA0716  | <i>S. pennellii</i>        | S.pen | a |     |   | 329844716 | 114438071 | 99,403,464  | 30% | Arequipa    | Peru    | 50   | -16.2  | -73.6  | Facultative-SC |
| LA0153  | <i>S. peruvianum</i>       | S.per |   |     | 6 | 90866996  | 68418645  | 77,375,883  | 85% | Ancash      | Peru    | 90   | -9.95  | -78.22 | Allogamous-SI  |
| LA0446  | <i>S. peruvianum</i>       | S.per |   |     | 4 | 105322468 | 66081629  | 76,578,198  | 73% | Arequipa    | Peru    | 150  | -15.78 | -74.39 | Allogamous-SI  |
| LA1272  | <i>S. peruvianum</i>       | S.per | a |     |   | 319497888 | 105046666 | 157,499,587 | 49% | Lima        | Peru    | 1000 | -11.52 | -77    | Allogamous-SI  |
| LA1278  | <i>S. peruvianum</i>       | S.per | a |     |   | 336836546 | 192320612 | 158,965,815 | 47% | Lima        | Peru    | 800  | -11.64 | -76.96 | Allogamous-SI  |
| LA1333  | <i>S. peruvianum</i>       | S.per |   |     | 3 | 101707500 | 67620815  | 88,724,222  | 87% | Arequipa    | Peru    | 700  | -16.57 | -72.63 | Allogamous-SI  |
| LA1336  | <i>S. peruvianum</i>       | S.per |   |     | 3 | 94154260  | 64819205  | 83,692,673  | 89% | Arequipa    | Peru    | 10   | -16.21 | -73.62 | Allogamous-SI  |
| LA1474  | <i>S. peruvianum</i>       | S.per |   |     | 2 | 77910156  | 70047648  | 68,197,814  | 88% | Arequipa    | Peru    | 1300 | -16.36 | -73.02 | Allogamous-SI  |
| LA1556  | <i>S. peruvianum</i>       | S.per | a |     |   | 277362664 | 188391821 | 150,555,118 | 54% | Lima        | Peru    | 250  | -12.13 | -77.03 | Allogamous-SI  |
| LA1558  | <i>S. peruvianum</i>       | S.per | a |     |   | 317996198 | 161196562 | 144,782,268 | 46% | Lima        | Peru    |      | -11.44 | -76.48 | Allogamous-SI  |
| LA1616  | <i>S. peruvianum</i>       | S.per |   |     | 2 | 91459430  | 76729666  | 76,457,864  | 84% | Lima        | Peru    | 350  | -12.08 | -76.92 | Allogamous-SI  |
| LA1913  | <i>S. peruvianum</i>       | S.per |   |     | 2 | 82115154  | 71664926  | 71,652,758  | 87% | Ica         | Peru    | 900  | -14.4  | -75.2  | Allogamous-SI  |
| LA1951  | <i>S. peruvianum</i>       | S.per |   |     | 2 | 118039694 | 79101191  | 80,529,978  | 68% | Arequipa    | Peru    | 65   | -16.46 | -73.09 | Allogamous-SI  |
| LA1954  | <i>S. peruvianum</i>       | S.per |   | YES | 1 | 78228862  | 60737907  | 68,249,537  | 87% | Arequipa    | Peru    | 50   | -17.02 | -72.08 | Allogamous-SI  |
| LA1954  | <i>S. peruvianum</i>       | S.per | a | YES |   | 350310992 | 190291649 | 160,499,579 | 46% | Arequipa    | Peru    | 50   | -17.02 | -72.08 | Allogamous-SI  |
| LA2732  | <i>S. peruvianum</i>       | S.per |   |     | 1 | 74996958  | 68517416  | 63,277,237  | 84% | Tarapaca    | Chile   | 1750 | -19.42 | -69.58 | Allogamous-SI  |
| LA2744  | <i>S. peruvianum</i>       | S.per |   | YES | 2 | 82672378  | 48268384  | 29,669,894  | 36% | Arica and   | Chile   | 400  | -18.55 | -70.15 | Allogamous-SI  |
| LA2744  | <i>S. peruvianum</i>       | S.per | c | YES |   | 35864470  | 52467877  | 23,167,401  | 65% | Arica and   | Chile   | 400  | -18.55 | -70.15 | Allogamous-SI  |
| LA2834  | <i>S. peruvianum</i>       | S.per |   |     | 3 | 90252506  | 76002730  | 66,065,914  | 73% | Ica         | Peru    | 1200 | -14.77 | -74.82 | Allogamous-SI  |
| LA2964  | <i>S. peruvianum</i>       | S.per |   | YES | 3 | 86482844  | 69973707  | 71,257,540  | 82% | Tacna       | Peru    | 100  | -18.03 | -70.84 | Allogamous-SI  |
| LA2964  | <i>S. peruvianum</i>       | S.per | c | YES |   | 24875770  | 54127010  | 20,010,110  | 80% | Tacna       | Peru    | 100  | -18.03 | -70.84 | Allogamous-SI  |
| LA3218  | <i>S. peruvianum</i>       | S.per |   |     | 2 | 82629604  | 74323523  | 67,628,976  | 82% | Arequipa    | Peru    | 600  | -16.95 | -72.08 | Allogamous-SI  |
| LA3636  | <i>S. peruvianum</i>       | S.per |   |     | 1 | 94711590  | 70088210  | 74,591,151  | 79% | Lima        | Peru    |      | -12.68 | -76.4  | Allogamous-SI  |
| LA4125  | <i>S. peruvianum</i>       | S.per |   |     | 1 | 83898054  | 44871634  | 66,134,403  | 79% | Tarapaca    | Chile   | 2510 | -19.31 | -69.42 | Facultative-SC |
| LA1578  | <i>S. pimpinellifolium</i> | S.pim | a | YES |   | 339542086 | 588512441 | 306,955,744 | 90% | La Libertad | Peru    |      | -7.33  | -79.58 | Autogamous-SC  |
| LA1584  | <i>S. pimpinellifolium</i> | S.pim | a |     |   | 339788834 | 657286470 | 258,871,034 | 76% | Lambayeque  | Peru    |      | -6.37  | -79.79 | Autogamous-SC  |
| LYC2798 | <i>S. pimpinellifolium</i> | S.pim | a |     |   | 346344194 | 444970160 | 293,051,229 | 85% |             |         |      |        |        |                |

a Afflitto S, Schiilen E, de Jong H, et al. (2014) Exploring genetic variation in the tomato (*Solanum section Lycopersicon*) clade by whole-genome sequencing. *Plant Journal* 80, 136-148.  
c Pease IR, Haak DC, Hahn MW, Mowle LC (2016) Phylogenomics Reveals Three Sources of Adaptive Variation during a Rapid Radiation. *PLoS Biology* 14



**Supplemental Table 2.** Additional data from Lin T, Zhu G, Zhang J, et al. (2014) Genomic analyses provide insights into the history of tomato breeding. Nature Genetics 46, 1220-1226 used for a *daði* analysis.

| <b>Id</b> | <b>Species</b>             | <b>Species Abbreviation</b> | <b>Duplicate</b> | <b>Total Reads</b> | <b>Province</b>   | <b>Country</b> | <b>Elevation</b> | <b>Longitude</b> | <b>Latitude</b> | <b>Mating System</b> |
|-----------|----------------------------|-----------------------------|------------------|--------------------|-------------------|----------------|------------------|------------------|-----------------|----------------------|
| LA1237    | <i>S. pimpinellifolium</i> | <i>S.pim</i>                |                  | 61858842           | Esmeraldes        | Ecuador        | 5                | 0.87             | 79.85           | Autogamous-SC        |
| LA1242    | <i>S. pimpinellifolium</i> | <i>S.pim</i>                |                  | 67157190           | Morona-Santiago   | Ecuador        | 900              |                  |                 | Autogamous-SC        |
| LA1246    | <i>S. pimpinellifolium</i> | <i>S.pim</i>                |                  | 57831786           | Loja              | Ecuador        | 1200             | -3.99            | -79.36          | Autogamous-SC        |
| LA1341    | <i>S. pimpinellifolium</i> | <i>S.pim</i>                |                  | 49877478           | Lima              | Peru           | 500              | -11.97           | -76.79          | Autogamous-SC        |
| LA1547    | <i>S. pimpinellifolium</i> | <i>S.pim</i>                |                  | 58611708           | Carchi            | Ecuador        | 3000             | 0.58             | -77.93          | Autogamous-SC        |
| LA1578    | <i>S. pimpinellifolium</i> | <i>S.pim</i>                | YES              | 55566326           | La Libertad       | Peru           |                  | -7.33            | -79.58          | Autogamous-SC        |
| LA1591    | <i>S. pimpinellifolium</i> | <i>S.pim</i>                |                  | 59333440           | La Libertad       | Peru           |                  | -7.72            | -79.12          | Autogamous-SC        |
| LA1595    | <i>S. pimpinellifolium</i> | <i>S.pim</i>                |                  | 56572400           | Ancash            | Peru           | 10               | -9.27            | -78.47          | Autogamous-SC        |
| LA1596    | <i>S. pimpinellifolium</i> | <i>S.pim</i>                |                  | 76571072           | Ancash            | Peru           | 15               | -8.93            | -78.57          | Autogamous-SC        |
| LA1933    | <i>S. pimpinellifolium</i> | <i>S.pim</i>                |                  | 59626428           | Arequipa          | Peru           | 140              | -15.46           | -74.45          | Autogamous-SC        |
| LA2147    | <i>S. pimpinellifolium</i> | <i>S.pim</i>                |                  | 55487778           | Cajamarca         | Peru           | 550              | -7.2             | -78.98          | Autogamous-SC        |
| LA2173    | <i>S. pimpinellifolium</i> | <i>S.pim</i>                |                  | 59361256           | Cajamarca         | Peru           | 1200             |                  |                 | Autogamous-SC        |
| LA2181    | <i>S. pimpinellifolium</i> | <i>S.pim</i>                |                  | 62378096           | Cajamarca         | Peru           | 850              | -5.78            | -78.78          | Autogamous-SC        |
| LA2184    | <i>S. pimpinellifolium</i> | <i>S.pim</i>                |                  | 55498628           | Amazonas          | Peru           | 450              | -5.59            | -78.55          | Autogamous-SC        |
| LA2187    | <i>S. pimpinellifolium</i> | <i>S.pim</i>                |                  | 56411540           | Amazonas          | Peru           | 650              | -5.93            | -78.05          | Autogamous-SC        |
| LA2656    | <i>S. pimpinellifolium</i> | <i>S.pim</i>                |                  | 65242236           | Tumbez            | Peru           | 70               | -3.8             | -80.7           | Autogamous-SC        |
| LA2857    | <i>S. pimpinellifolium</i> | <i>S.pim</i>                |                  | 55283766           | Galapagos Islands | Peru           | 5                | -0.95            | -90.97          | Autogamous-SC        |

| <b>Supplemental Table 3. Heterozygosity for each individual.</b> |           |                       |
|------------------------------------------------------------------|-----------|-----------------------|
| <b>Species</b>                                                   | <b>Id</b> | <b>Heterozygosity</b> |
| Hybrid                                                           | LA1782    | 0.38%                 |
| Hybrid                                                           | LA1930    | 0.66%                 |
| Hybrid                                                           | LA1932    | 0.65%                 |
| <i>S.arc</i>                                                     | LA2157    | 0.06%                 |
| <i>S.arc</i>                                                     | LA2172    | 0.15%                 |
| <i>S.arc</i>                                                     | LA2172    | 0.22%                 |
| <i>S.chi</i>                                                     | LA0752    | 0.10%                 |
| <i>S.chi</i>                                                     | LA1958    | 0.54%                 |
| <i>S.chi</i>                                                     | LA1960    | 0.57%                 |
| <i>S.chi</i>                                                     | LA1963    | 0.56%                 |
| <i>S.chi</i>                                                     | LA1967    | 0.55%                 |
| <i>S.chi</i>                                                     | LA1969    | 0.39%                 |
| <i>S.chi</i>                                                     | LA1971    | 0.54%                 |
| <i>S.chi</i>                                                     | LA2748    | 0.50%                 |
| <i>S.chi</i>                                                     | LA2750    | 0.26%                 |
| <i>S.chi</i>                                                     | LA2753    | 0.53%                 |
| <i>S.chi</i>                                                     | LA2765    | 0.43%                 |
| <i>S.chi</i>                                                     | LA2771    | 0.54%                 |
| <i>S.chi</i>                                                     | LA2778    | 0.51%                 |
| <i>S.chi</i>                                                     | LA2880    | 0.31%                 |
| <i>S.chi</i>                                                     | LA2884    | 0.38%                 |
| <i>S.chi</i>                                                     | LA2930    | 0.17%                 |
| <i>S.chi</i>                                                     | LA3114    | 0.54%                 |
| <i>S.chi</i>                                                     | LA4117A   | 0.35%                 |
| <i>S.chm</i>                                                     | LA1028    | 0.04%                 |
| <i>S.chm</i>                                                     | LA1316    | 0.08%                 |
| <i>S.chm</i>                                                     | LA2663    | 0.04%                 |
| <i>S.chm</i>                                                     | LA2695    | 0.06%                 |
| <i>S.cor</i>                                                     | LA0107    | 0.39%                 |
| <i>S.cor</i>                                                     | LA0118    | 0.64%                 |
| <i>S.cor</i>                                                     | LA0444    | 0.68%                 |
| <i>S.cor</i>                                                     | LA1274    | 0.61%                 |
| <i>S.gal</i>                                                     | LA0483    | 0.01%                 |
| <i>S.gal</i>                                                     | LA1044    | 0.02%                 |
| <i>S.gal</i>                                                     | LA1401    | 0.03%                 |
| <i>S.hab</i>                                                     | CGN15791  | 0.08%                 |
| <i>S.hab</i>                                                     | CGN15792  | 0.15%                 |
| <i>S.hab</i>                                                     | LA0407    | 0.14%                 |
| <i>S.hab</i>                                                     | LA1777    | 0.24%                 |
| <i>S.hab</i>                                                     | LYC4      | 0.08%                 |
| <i>S.hab</i>                                                     | PI134418  | 0.27%                 |
| <i>S.hua</i>                                                     | LA1358    | 0.57%                 |
| <i>S.hua</i>                                                     | LA1360    | 0.51%                 |
| <i>S.hua</i>                                                     | LA1364    | 0.49%                 |
| <i>S.hua</i>                                                     | LA1364    | 0.51%                 |

|              |         |       |
|--------------|---------|-------|
| <i>S.hua</i> | LA1365  | 0.73% |
| <i>S.hua</i> | LA1983  | 0.45% |
| <i>S.lyc</i> | LA2951  | 0.31% |
| <i>S.neo</i> | LA0735  | 0.04% |
| <i>S.neo</i> | LA1322  | 0.04% |
| <i>S.neo</i> | LA2133  | 0.05% |
| <i>S.neo</i> | LA2133  | 0.04% |
| <i>S.och</i> | LA2682  | 0.11% |
| <i>S.pen</i> | LA0716  | 0.11% |
| <i>S.per</i> | LA0153  | 0.32% |
| <i>S.per</i> | LA0446  | 0.39% |
| <i>S.per</i> | LA1272  | 0.58% |
| <i>S.per</i> | LA1278  | 0.55% |
| <i>S.per</i> | LA1333  | 0.41% |
| <i>S.per</i> | LA1336  | 0.40% |
| <i>S.per</i> | LA1474  | 0.32% |
| <i>S.per</i> | LA1556  | 0.38% |
| <i>S.per</i> | LA1558  | 0.72% |
| <i>S.per</i> | LA1616  | 0.64% |
| <i>S.per</i> | LA1913  | 0.66% |
| <i>S.per</i> | LA1951  | 0.47% |
| <i>S.per</i> | LA1954  | 0.40% |
| <i>S.per</i> | LA1954  | 0.37% |
| <i>S.per</i> | LA2732  | 0.55% |
| <i>S.per</i> | LA2744  | 0.66% |
| <i>S.per</i> | LA2744  | 0.60% |
| <i>S.per</i> | LA2834  | 0.60% |
| <i>S.per</i> | LA2964  | 0.28% |
| <i>S.per</i> | LA2964  | 0.32% |
| <i>S.per</i> | LA3218  | 0.44% |
| <i>S.per</i> | LA3636  | 0.78% |
| <i>S.per</i> | LA4125  | 0.53% |
| <i>S.pim</i> | LA1578  | 0.14% |
| <i>S.pim</i> | LA1584  | 0.05% |
| <i>S.pim</i> | LYC2798 | 0.03% |

| <b>Supplemental Table 4.</b> Highest log-likelihood parameters inferred from $\partial a \partial i$ with confidence intervals from 100 conventional bootstraps. |                                                   |                                                                                                           |
|------------------------------------------------------------------------------------------------------------------------------------------------------------------|---------------------------------------------------|-----------------------------------------------------------------------------------------------------------|
| <b>Parameter</b>                                                                                                                                                 | <b>Value</b>                                      | <b>Description</b>                                                                                        |
| Maximum Log-Likelihood                                                                                                                                           | -11,786                                           |                                                                                                           |
| Theta                                                                                                                                                            | (24,409, 25,758)                                  | Ancestral population size ( $4 \cdot N_{\text{ref}} \cdot L \cdot \mu$ )                                  |
| $N_{\text{ref}}$                                                                                                                                                 | (417,486, 440,556)                                | Individuals in the ancestral population<br>( $\text{Theta} / L \cdot \mu \cdot 4$ )                       |
| L                                                                                                                                                                | 2,866,063.30                                      | Effective length. The number of synonymous nucleotides sequenced to a depth of 3 reads in all individuals |
| Tau                                                                                                                                                              | (1.46, 1.56)                                      | Speciation event in $2 \cdot N_{\text{ref}}$                                                              |
| Split Time                                                                                                                                                       | (1,216,455, 1,374,108)                            | Speciation event in years ( $2 \cdot N_{\text{ref}} \cdot \text{Tau} \cdot g$ ), if $g = 1$               |
| Nu1F                                                                                                                                                             | (1.26, 1.32)                                      | <i>S. chilense</i> population size relative to the ancestral population ( $N_{\text{ref}}$ )              |
| Nu2F                                                                                                                                                             | (3.69, 3.87)                                      | <i>S. peruvianum</i> population size                                                                      |
| m12                                                                                                                                                              | (0.26, 0.28)                                      | <i>S. chilense</i> individuals introduced into <i>S. peruvianum</i> population in 1 generation            |
| m21                                                                                                                                                              | (0.13, 0.14)                                      | <i>S. peruvianum</i> individuals introduced into <i>S. chilense</i> population in 1 generation            |
| M12                                                                                                                                                              | ( $3.11 \times 10^{-7}$ , $3.23 \times 10^{-7}$ ) | Fraction of <i>S. chilense</i> individuals derived from <i>S. peruvianum</i> in 1 generation              |
| M21                                                                                                                                                              | ( $1.54 \times 10^{-7}$ , $1.61 \times 10^{-7}$ ) | Fraction of <i>S. peruvianum</i> individuals derived from <i>S. chilense</i> in 1 generation              |
| outgr_misid                                                                                                                                                      | (0.11, 0.15)                                      | Outgroup misidentification rate                                                                           |
| $\mu$                                                                                                                                                            | $5.1 \cdot 10^{-9}$                               | Mutation rate (Roselius et al. 2005)                                                                      |

| <b>Supplemental Table 5. Number of seeds and seed-like structures (SLS) for individual crosses.</b> |         |         |                |                |      |     |
|-----------------------------------------------------------------------------------------------------|---------|---------|----------------|----------------|------|-----|
| Cross                                                                                               | Parent1 | Parent2 | SpeciesParent1 | SpeciesParent2 | Seed | SLS |
| LA0153xLA1932                                                                                       | LA0153  | LA1932  | Sper           | Hybrid         | 2    | 9   |
| LA0153xLA1932                                                                                       | LA0153  | LA1932  | Sper           | Hybrid         | 1    | 10  |
| LA0153xLA1932                                                                                       | LA0153  | LA1932  | Sper           | Hybrid         | 1    | 11  |
| LA0153xLA1932                                                                                       | LA0153  | LA1932  | Sper           | Hybrid         | 3    | 4   |
| LA0153xLA1932                                                                                       | LA0153  | LA1932  | Sper           | Hybrid         | 0    | 0   |
| LA0153xLA1932                                                                                       | LA0153  | LA1932  | Sper           | Hybrid         | 2    | 4   |
| LA0153xLA1932                                                                                       | LA0153  | LA1932  | Sper           | Hybrid         | 0    | 29  |
| LA0153xLA1932                                                                                       | LA0153  | LA1932  | Sper           | Hybrid         | 0    | 31  |
| LA0153xLA1932                                                                                       | LA0153  | LA1932  | Sper           | Hybrid         | 0    | 34  |
| LA0153xLA1932                                                                                       | LA0153  | LA1932  | Sper           | Hybrid         | 0    | 23  |
| LA0153xLA1932                                                                                       | LA0153  | LA1932  | Sper           | Hybrid         | 0    | 21  |
| LA0153xLA1932                                                                                       | LA0153  | LA1932  | Sper           | Hybrid         | 0    | 6   |
| LA0153xLA1932                                                                                       | LA0153  | LA1932  | Sper           | Hybrid         | 0    | 2   |
| LA1954xLA1932                                                                                       | LA1954  | LA1932  | Sper           | Hybrid         | 0    | 54  |
| LA1954xLA1932                                                                                       | LA1954  | LA1932  | Sper           | Hybrid         | 0    | 42  |
| LA1954xLA1932                                                                                       | LA1954  | LA1932  | Sper           | Hybrid         | 0    | 46  |
| LA1954xLA1932                                                                                       | LA1954  | LA1932  | Sper           | Hybrid         | 0    | 50  |
| LA1954xLA1932                                                                                       | LA1954  | LA1932  | Sper           | Hybrid         | 0    | 35  |
| LA1954xLA1932                                                                                       | LA1954  | LA1932  | Sper           | Hybrid         | 0    | 39  |
| LA1954xLA1932                                                                                       | LA1954  | LA1932  | Sper           | Hybrid         | 0    | 48  |
| LA1954xLA1932                                                                                       | LA1954  | LA1932  | Sper           | Hybrid         | 0    | 29  |
| LA1954xLA1932                                                                                       | LA1954  | LA1932  | Sper           | Hybrid         | 0    | 32  |
| LA1954xLA1932                                                                                       | LA1954  | LA1932  | Sper           | Hybrid         | 0    | 36  |
| LA1954xLA1932                                                                                       | LA1954  | LA1932  | Sper           | Hybrid         | 0    | 32  |
| LA1954xLA1932                                                                                       | LA1954  | LA1932  | Sper           | Hybrid         | 0    | 38  |
| LA1954xLA1932                                                                                       | LA1954  | LA1932  | Sper           | Hybrid         | 0    | 36  |
| LA1954xLA1932                                                                                       | LA1954  | LA1932  | Sper           | Hybrid         | 0    | 31  |
| LA1954xLA1932                                                                                       | LA1954  | LA1932  | Sper           | Hybrid         | 0    | 28  |
| LA1954xLA1932                                                                                       | LA1954  | LA1932  | Sper           | Hybrid         | 0    | 26  |
| LA1954xLA1932                                                                                       | LA1954  | LA1932  | Sper           | Hybrid         | 0    | 27  |
| LA1954xLA1932                                                                                       | LA1954  | LA1932  | Sper           | Hybrid         | 0    | 33  |
| LA1954xLA1932                                                                                       | LA1954  | LA1932  | Sper           | Hybrid         | 0    | 27  |
| LA1954xLA1932                                                                                       | LA1954  | LA1932  | Sper           | Hybrid         | 0    | 29  |
| LA1954xLA1932                                                                                       | LA1954  | LA1932  | Sper           | Hybrid         | 0    | 23  |

|               |        |        |      |        |   |    |
|---------------|--------|--------|------|--------|---|----|
| LA1954xLA1932 | LA1954 | LA1932 | Sper | Hybrid | 0 | 25 |
| LA1954xLA1932 | LA1954 | LA1932 | Sper | Hybrid | 0 | 29 |
| LA1954xLA1932 | LA1954 | LA1932 | Sper | Hybrid | 0 | 27 |
| LA1954xLA1932 | LA1954 | LA1932 | Sper | Hybrid | 0 | 23 |
| LA1954xLA1932 | LA1954 | LA1932 | Sper | Hybrid | 0 | 15 |
| LA1954xLA1932 | LA1954 | LA1932 | Sper | Hybrid | 0 | 26 |
| LA2732xLA1932 | LA2732 | LA1932 | Sper | Hybrid | 1 | 6  |
| LA2732xLA1932 | LA2732 | LA1932 | Sper | Hybrid | 0 | 6  |
| LA2732xLA1932 | LA2732 | LA1932 | Sper | Hybrid | 0 | 21 |
| LA2732xLA1932 | LA2732 | LA1932 | Sper | Hybrid | 0 | 16 |
| LA2732xLA1932 | LA2732 | LA1932 | Sper | Hybrid | 0 | 19 |
| LA2732xLA1932 | LA2732 | LA1932 | Sper | Hybrid | 0 | 14 |
| LA2732xLA1932 | LA2732 | LA1932 | Sper | Hybrid | 0 | 16 |
| LA2732xLA1932 | LA2732 | LA1932 | Sper | Hybrid | 0 | 18 |
| LA2732xLA1932 | LA2732 | LA1932 | Sper | Hybrid | 1 | 32 |
| LA2732xLA1932 | LA2732 | LA1932 | Sper | Hybrid | 0 | 34 |
| LA2732xLA1932 | LA2732 | LA1932 | Sper | Hybrid | 0 | 38 |
| LA2732xLA1932 | LA2732 | LA1932 | Sper | Hybrid | 0 | 36 |
| LA2732xLA1932 | LA2732 | LA1932 | Sper | Hybrid | 0 | 26 |
| LA2732xLA1932 | LA2732 | LA1932 | Sper | Hybrid | 0 | 34 |
| LA2732xLA1932 | LA2732 | LA1932 | Sper | Hybrid | 0 | 31 |
| LA2732xLA1932 | LA2732 | LA1932 | Sper | Hybrid | 0 | 28 |
| LA2732xLA1932 | LA2732 | LA1932 | Sper | Hybrid | 0 | 27 |
| LA2732xLA1932 | LA2732 | LA1932 | Sper | Hybrid | 0 | 22 |
| LA2732xLA1932 | LA2732 | LA1932 | Sper | Hybrid | 0 | 31 |
| LA2732xLA1932 | LA2732 | LA1932 | Sper | Hybrid | 0 | 38 |
| LA2732xLA1932 | LA2732 | LA1932 | Sper | Hybrid | 0 | 32 |
| LA2930xLA1932 | LA2930 | LA1932 | Schi | Hybrid | 1 | 30 |
| LA2930xLA1932 | LA2930 | LA1932 | Schi | Hybrid | 1 | 15 |
| LA2930xLA1932 | LA2930 | LA1932 | Schi | Hybrid | 2 | 15 |
| LA2930xLA1932 | LA2930 | LA1932 | Schi | Hybrid | 1 | 16 |
| LA2930xLA1932 | LA2930 | LA1932 | Schi | Hybrid | 0 | 14 |
| LA2930xLA1932 | LA2930 | LA1932 | Schi | Hybrid | 1 | 18 |
| LA2930xLA1932 | LA2930 | LA1932 | Schi | Hybrid | 0 | 19 |
| LA2930xLA1932 | LA2930 | LA1932 | Schi | Hybrid | 0 | 16 |
| LA2930xLA1932 | LA2930 | LA1932 | Schi | Hybrid | 1 | 39 |
| LA2930xLA1932 | LA2930 | LA1932 | Schi | Hybrid | 2 | 28 |
| LA2930xLA1932 | LA2930 | LA1932 | Schi | Hybrid | 0 | 0  |
| LA2930xLA1932 | LA2930 | LA1932 | Schi | Hybrid | 0 | 0  |

|               |        |        |      |        |    |    |
|---------------|--------|--------|------|--------|----|----|
| LA2930xLA1932 | LA2930 | LA1932 | Schi | Hybrid | 3  | 14 |
| LA2964xLA1932 | LA2964 | LA1932 | Sper | Hybrid | 5  | 9  |
| LA2964xLA1932 | LA2964 | LA1932 | Sper | Hybrid | 1  | 13 |
| LA2964xLA1932 | LA2964 | LA1932 | Sper | Hybrid | 5  | 6  |
| LA2964xLA1932 | LA2964 | LA1932 | Sper | Hybrid | 1  | 12 |
| LA2964xLA1932 | LA2964 | LA1932 | Sper | Hybrid | 3  | 3  |
| LA2964xLA1932 | LA2964 | LA1932 | Sper | Hybrid | 3  | 2  |
| LA2964xLA1932 | LA2964 | LA1932 | Sper | Hybrid | 2  | 9  |
| LA2964xLA1932 | LA2964 | LA1932 | Sper | Hybrid | 1  | 6  |
| LA2964xLA1932 | LA2964 | LA1932 | Sper | Hybrid | 2  | 7  |
| LA2964xLA1932 | LA2964 | LA1932 | Sper | Hybrid | 1  | 6  |
| LA0153xLA2930 | LA0153 | LA2930 | Sper | Schi   | 0  | 8  |
| LA0153xLA2930 | LA0153 | LA2930 | Sper | Schi   | 0  | 3  |
| LA0153xLA2930 | LA0153 | LA2930 | Sper | Schi   | 0  | 2  |
| LA0153xLA2930 | LA0153 | LA2930 | Sper | Schi   | 0  | 3  |
| LA0153xLA2930 | LA0153 | LA2930 | Sper | Schi   | 0  | 4  |
| LA0153xLA2930 | LA0153 | LA2930 | Sper | Schi   | 0  | 1  |
| LA1274xLA2732 | LA1274 | LA2732 | Scor | Sper   | 42 | 0  |
| LA1274xLA2732 | LA1274 | LA2732 | Scor | Sper   | 39 | 0  |
| LA1274xLA2930 | LA1274 | LA2930 | Scor | Schi   | 0  | 6  |
| LA1274xLA2930 | LA1274 | LA2930 | Scor | Schi   | 0  | 8  |
| LA1274xLA2930 | LA1274 | LA2930 | Scor | Schi   | 0  | 7  |
| LA1274xLA2930 | LA1274 | LA2930 | Scor | Schi   | 0  | 4  |
| LA1274xLA2930 | LA1274 | LA2930 | Scor | Schi   | 0  | 4  |
| LA1274xLA2930 | LA1274 | LA2930 | Scor | Schi   | 0  | 2  |
| LA1954xLA1274 | LA1954 | LA1274 | Sper | Scor   | 8  | 12 |
| LA1954xLA1274 | LA1954 | LA1274 | Sper | Scor   | 8  | 17 |
| LA1954xLA1274 | LA1954 | LA1274 | Sper | Scor   | 3  | 12 |
| LA1954xLA1274 | LA1954 | LA1274 | Sper | Scor   | 0  | 7  |
| LA1954xLA2930 | LA1954 | LA2930 | Sper | Schi   | 0  | 21 |
| LA1954xLA2930 | LA1954 | LA2930 | Sper | Schi   | 0  | 27 |
| LA1954xLA2930 | LA1954 | LA2930 | Sper | Schi   | 0  | 13 |
| LA1954xLA2930 | LA1954 | LA2930 | Sper | Schi   | 0  | 6  |
| LA1954xLA2930 | LA1954 | LA2930 | Sper | Schi   | 0  | 23 |
| LA2732xLA2930 | LA2732 | LA2930 | Sper | Schi   | 0  | 24 |
| LA2732xLA2930 | LA2732 | LA2930 | Sper | Schi   | 0  | 10 |
| LA2732xLA2930 | LA2732 | LA2930 | Sper | Schi   | 0  | 7  |
| LA2732xLA2930 | LA2732 | LA2930 | Sper | Schi   | 0  | 48 |
| LA2732xLA2930 | LA2732 | LA2930 | Sper | Schi   | 0  | 34 |

|               |        |        |      |      |    |    |
|---------------|--------|--------|------|------|----|----|
| LA2732xLA2930 | LA2732 | LA2930 | Sper | Schi | 0  | 2  |
| LA2732xLA2930 | LA2732 | LA2930 | Sper | Schi | 0  | 1  |
| LA2732xLA2930 | LA2732 | LA2930 | Sper | Schi | 43 | 0  |
| LA2930xLA1274 | LA2930 | LA1274 | Schi | Scor | 0  | 23 |
| LA2930xLA1274 | LA2930 | LA1274 | Schi | Scor | 0  | 19 |
| LA2930xLA1274 | LA2930 | LA1274 | Schi | Scor | 0  | 0  |
| LA2930xLA1274 | LA2930 | LA1274 | Schi | Scor | 0  | 0  |
| LA2930xLA1274 | LA2930 | LA1274 | Schi | Scor | 0  | 24 |
| LA2930xLA1274 | LA2930 | LA1274 | Schi | Scor | 0  | 22 |
| LA2930xLA1274 | LA2930 | LA1274 | Schi | Scor | 0  | 23 |
| LA2930xLA1954 | LA2930 | LA1954 | Schi | Sper | 0  | 9  |
| LA2930xLA1954 | LA2930 | LA1954 | Schi | Sper | 0  | 22 |
| LA2930xLA1954 | LA2930 | LA1954 | Schi | Sper | 0  | 16 |
| LA2930xLA1954 | LA2930 | LA1954 | Schi | Sper | 0  | 23 |
| LA2930xLA1954 | LA2930 | LA1954 | Schi | Sper | 0  | 20 |
| LA2930xLA1954 | LA2930 | LA1954 | Schi | Sper | 0  | 15 |
| LA2930xLA2732 | LA2930 | LA2732 | Schi | Sper | 0  | 26 |
| LA2930xLA2732 | LA2930 | LA2732 | Schi | Sper | 0  | 21 |
| LA2930xLA2732 | LA2930 | LA2732 | Schi | Sper | 0  | 30 |
| LA2930xLA2732 | LA2930 | LA2732 | Schi | Sper | 0  | 21 |
| LA2930xLA2732 | LA2930 | LA2732 | Schi | Sper | 0  | 18 |
| LA2930xLA2732 | LA2930 | LA2732 | Schi | Sper | 0  | 23 |
| LA2930xLA2732 | LA2930 | LA2732 | Schi | Sper | 0  | 17 |
| LA2930xLA2732 | LA2930 | LA2732 | Schi | Sper | 0  | 25 |
| LA2930xLA2732 | LA2930 | LA2732 | Schi | Sper | 1  | 16 |
| LA2930xLA2732 | LA2930 | LA2732 | Schi | Sper | 0  | 13 |
| LA2930xLA2732 | LA2930 | LA2732 | Schi | Sper | 0  | 15 |
| LA2930xLA2732 | LA2930 | LA2732 | Schi | Sper | 0  | 17 |
| LA2930xLA2732 | LA2930 | LA2732 | Schi | Sper | 1  | 8  |
| LA2930xLA2732 | LA2930 | LA2732 | Schi | Sper | 0  | 6  |
| LA2930xLA2732 | LA2930 | LA2732 | Schi | Sper | 0  | 5  |
| LA2930xLA2732 | LA2930 | LA2732 | Schi | Sper | 0  | 5  |
| LA2930xLA2964 | LA2930 | LA2964 | Schi | Sper | 0  | 25 |
| LA2930xLA2964 | LA2930 | LA2964 | Schi | Sper | 0  | 28 |
| LA2930xLA2964 | LA2930 | LA2964 | Schi | Sper | 0  | 26 |
| LA2930xLA2964 | LA2930 | LA2964 | Schi | Sper | 0  | 22 |
| LA2930xLA2964 | LA2930 | LA2964 | Schi | Sper | 0  | 33 |
| LA2930xLA2964 | LA2930 | LA2964 | Schi | Sper | 0  | 26 |
| LA2930xLA2964 | LA2930 | LA2964 | Schi | Sper | 0  | 28 |



|               |        |        |      |      |    |    |
|---------------|--------|--------|------|------|----|----|
| LA2930xLA2964 | LA2930 | LA2964 | Schi | Sper | 0  | 33 |
| LA2930xLA2964 | LA2930 | LA2964 | Schi | Sper | 0  | 30 |
| LA2930xLA2964 | LA2930 | LA2964 | Schi | Sper | 0  | 27 |
| LA2930xLA2964 | LA2930 | LA2964 | Schi | Sper | 0  | 25 |
| LA2930xLA2964 | LA2930 | LA2964 | Schi | Sper | 0  | 29 |
| LA2930xLA2964 | LA2930 | LA2964 | Schi | Sper | 0  | 31 |
| LA2930xLA2964 | LA2930 | LA2964 | Schi | Sper | 0  | 0  |
| LA0153xLA1954 | LA0153 | LA1954 | Sper | Sper | 68 | 0  |
| LA0153xLA1954 | LA0153 | LA1954 | Sper | Sper | 61 | 0  |
| LA0153xLA1954 | LA0153 | LA1954 | Sper | Sper | 67 | 0  |
| LA0153xLA1954 | LA0153 | LA1954 | Sper | Sper | 29 | 0  |
| LA0153xLA1954 | LA0153 | LA1954 | Sper | Sper | 61 | 0  |
| LA0153xLA1954 | LA0153 | LA1954 | Sper | Sper | 15 | 0  |
| LA0153xLA1954 | LA0153 | LA1954 | Sper | Sper | 23 | 0  |
| LA0153xLA2732 | LA0153 | LA2732 | Sper | Sper | 51 | 0  |
| LA0153xLA2732 | LA0153 | LA2732 | Sper | Sper | 47 | 0  |
| LA0153xLA2732 | LA0153 | LA2732 | Sper | Sper | 32 | 0  |
| LA1954xLA0153 | LA1954 | LA0153 | Sper | Sper | 9  | 48 |
| LA1954xLA0153 | LA1954 | LA0153 | Sper | Sper | 10 | 45 |
| LA1954xLA0153 | LA1954 | LA0153 | Sper | Sper | 30 | 29 |
| LA1954xLA0153 | LA1954 | LA0153 | Sper | Sper | 2  | 8  |
| LA1954xLA0153 | LA1954 | LA0153 | Sper | Sper | 33 | 14 |
| LA1954xLA0153 | LA1954 | LA0153 | Sper | Sper | 36 | 10 |
| LA1954xLA0153 | LA1954 | LA0153 | Sper | Sper | 25 | 19 |
| LA1954xLA0153 | LA1954 | LA0153 | Sper | Sper | 11 | 8  |
| LA1954xLA0153 | LA1954 | LA0153 | Sper | Sper | 8  | 9  |
| LA1954xLA0153 | LA1954 | LA0153 | Sper | Sper | 25 | 23 |
| LA1954xLA0153 | LA1954 | LA0153 | Sper | Sper | 33 | 23 |
| LA1954xLA0153 | LA1954 | LA0153 | Sper | Sper | 15 | 25 |
| LA1954xLA0153 | LA1954 | LA0153 | Sper | Sper | 8  | 32 |
| LA1954xLA0153 | LA1954 | LA0153 | Sper | Sper | 10 | 30 |
| LA1954xLA2732 | LA1954 | LA2732 | Sper | Sper | 35 | 7  |
| LA1954xLA2732 | LA1954 | LA2732 | Sper | Sper | 37 | 15 |
| LA1954xLA2732 | LA1954 | LA2732 | Sper | Sper | 34 | 9  |
| LA1954xLA2732 | LA1954 | LA2732 | Sper | Sper | 21 | 9  |
| LA1954xLA2732 | LA1954 | LA2732 | Sper | Sper | 21 | 7  |
| LA1954xLA2732 | LA1954 | LA2732 | Sper | Sper | 21 | 11 |
| LA1954xLA2732 | LA1954 | LA2732 | Sper | Sper | 18 | 9  |
| LA1954xLA2732 | LA1954 | LA2732 | Sper | Sper | 22 | 7  |

|               |        |        |      |      |    |    |
|---------------|--------|--------|------|------|----|----|
| LA1954xLA2964 | LA1954 | LA2964 | Sper | Sper | 37 | 7  |
| LA1954xLA2964 | LA1954 | LA2964 | Sper | Sper | 22 | 16 |
| LA1954xLA2964 | LA1954 | LA2964 | Sper | Sper | 14 | 16 |
| LA1954xLA2964 | LA1954 | LA2964 | Sper | Sper | 9  | 15 |
| LA1954xLA2964 | LA1954 | LA2964 | Sper | Sper | 14 | 3  |
| LA1954xLA2964 | LA1954 | LA2964 | Sper | Sper | 6  | 3  |
| LA1954xLA2964 | LA1954 | LA2964 | Sper | Sper | 3  | 4  |
| LA2732xLA0153 | LA2732 | LA0153 | Sper | Sper | 79 | 0  |
| LA2732xLA0153 | LA2732 | LA0153 | Sper | Sper | 54 | 0  |
| LA2732xLA0153 | LA2732 | LA0153 | Sper | Sper | 56 | 0  |
| LA2732xLA0153 | LA2732 | LA0153 | Sper | Sper | 53 | 0  |
| LA2732xLA0153 | LA2732 | LA0153 | Sper | Sper | 54 | 0  |
| LA2732xLA0153 | LA2732 | LA0153 | Sper | Sper | 52 | 0  |
| LA2732xLA0153 | LA2732 | LA0153 | Sper | Sper | 57 | 0  |
| LA2732xLA0153 | LA2732 | LA0153 | Sper | Sper | 61 | 0  |
| LA2732xLA0153 | LA2732 | LA0153 | Sper | Sper | 56 | 0  |
| LA2732xLA0153 | LA2732 | LA0153 | Sper | Sper | 53 | 0  |
| LA2732xLA0153 | LA2732 | LA0153 | Sper | Sper | 67 | 0  |
| LA2732xLA0153 | LA2732 | LA0153 | Sper | Sper | 49 | 0  |
| LA2732xLA1954 | LA2732 | LA1954 | Sper | Sper | 25 | 0  |
| LA2732xLA1954 | LA2732 | LA1954 | Sper | Sper | 35 | 0  |
| LA2732xLA1954 | LA2732 | LA1954 | Sper | Sper | 33 | 0  |
| LA2732xLA1954 | LA2732 | LA1954 | Sper | Sper | 40 | 0  |
| LA2732xLA1954 | LA2732 | LA1954 | Sper | Sper | 36 | 0  |
| LA2732xLA1954 | LA2732 | LA1954 | Sper | Sper | 29 | 0  |
| LA2732xLA1954 | LA2732 | LA1954 | Sper | Sper | 55 | 0  |
| LA2732xLA1954 | LA2732 | LA1954 | Sper | Sper | 57 | 0  |
| LA2732xLA1954 | LA2732 | LA1954 | Sper | Sper | 55 | 0  |
| LA2732xLA1954 | LA2732 | LA1954 | Sper | Sper | 56 | 0  |
| LA2732xLA1954 | LA2732 | LA1954 | Sper | Sper | 51 | 0  |
| LA2732xLA2964 | LA2732 | LA2964 | Sper | Sper | 74 | 0  |
| LA2732xLA2964 | LA2732 | LA2964 | Sper | Sper | 54 | 0  |
| LA2732xLA2964 | LA2732 | LA2964 | Sper | Sper | 53 | 0  |
| LA2732xLA2964 | LA2732 | LA2964 | Sper | Sper | 43 | 0  |
| LA2732xLA2964 | LA2732 | LA2964 | Sper | Sper | 60 | 0  |
| LA2732xLA2964 | LA2732 | LA2964 | Sper | Sper | 66 | 0  |
| LA2732xLA2964 | LA2732 | LA2964 | Sper | Sper | 52 | 0  |
| LA2732xLA2964 | LA2732 | LA2964 | Sper | Sper | 59 | 0  |
| LA2732xLA2964 | LA2732 | LA2964 | Sper | Sper | 48 | 0  |

|               |        |        |      |      |    |    |
|---------------|--------|--------|------|------|----|----|
| LA2732xLA2964 | LA2732 | LA2964 | Sper | Sper | 61 | 0  |
| LA2964xLA0153 | LA2964 | LA0153 | Sper | Sper | 21 | 5  |
| LA2964xLA0153 | LA2964 | LA0153 | Sper | Sper | 15 | 11 |
| LA2964xLA0153 | LA2964 | LA0153 | Sper | Sper | 12 | 8  |
| LA2964xLA0153 | LA2964 | LA0153 | Sper | Sper | 18 | 8  |
| LA2964xLA2732 | LA2964 | LA2732 | Sper | Sper | 20 | 0  |
| LA2964xLA2732 | LA2964 | LA2732 | Sper | Sper | 24 | 3  |
| LA2964xLA2732 | LA2964 | LA2732 | Sper | Sper | 15 | 9  |
| LA2964xLA2732 | LA2964 | LA2732 | Sper | Sper | 22 | 2  |
| LA2964xLA2732 | LA2964 | LA2732 | Sper | Sper | 15 | 3  |
| LA2964xLA2732 | LA2964 | LA2732 | Sper | Sper | 15 | 6  |
| LA2964xLA2732 | LA2964 | LA2732 | Sper | Sper | 17 | 4  |
